# Supplementary material for: Ventilation during COVID-19 in a school for students with intellectual and developmental disabilities (IDD)
Source: bioRxiv or medRxiv preprint supplement (doi:10.1101/2023.09.08.23295268), 2023-09-20
Supplement: Supplementary file [file media-1.pdf]

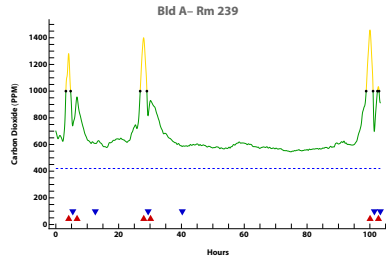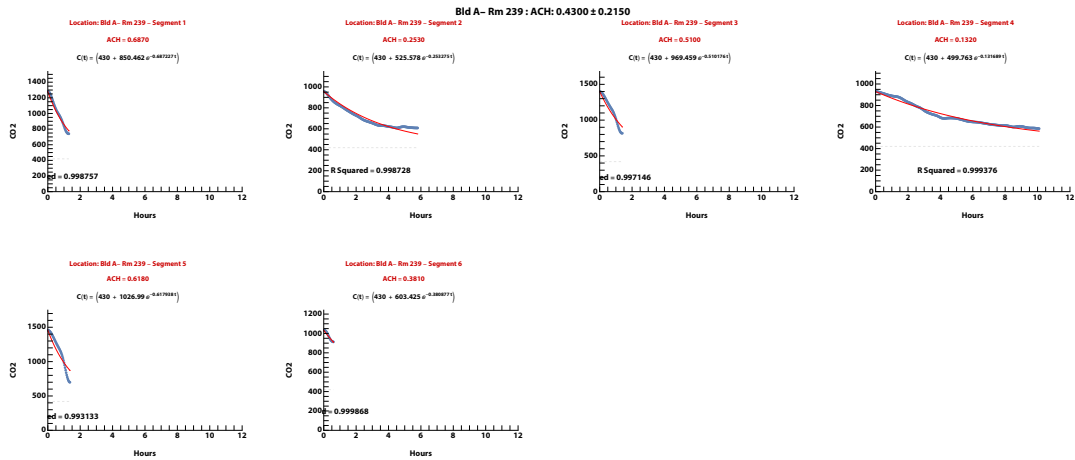

**Zand, et al. (2023). Ventilation during COVID-19 in a school for students with intellectual and developmental disabilities (IDD) [Submitted]**

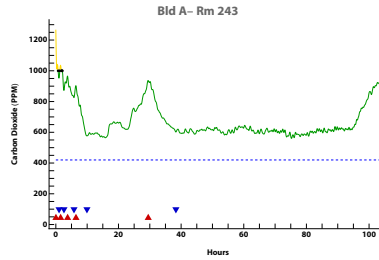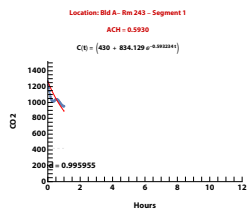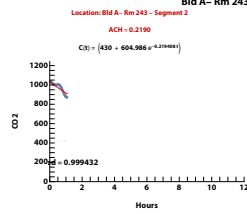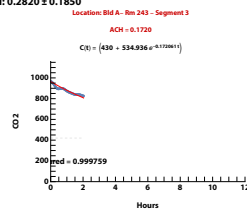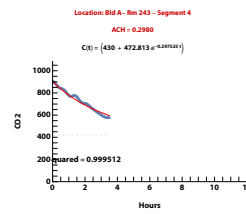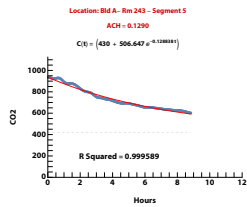

Zand, et al. (2023). Ventilation during COVID-19 in a school for students with intellectual and developmental disabilities (IDD) [Submitted]

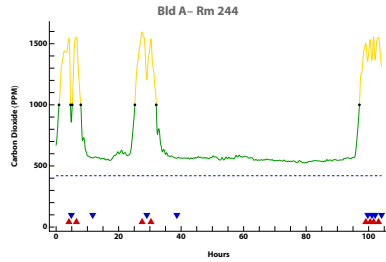

Bid A- Rm 244 : ACH = 0.4050 ± 0.2650

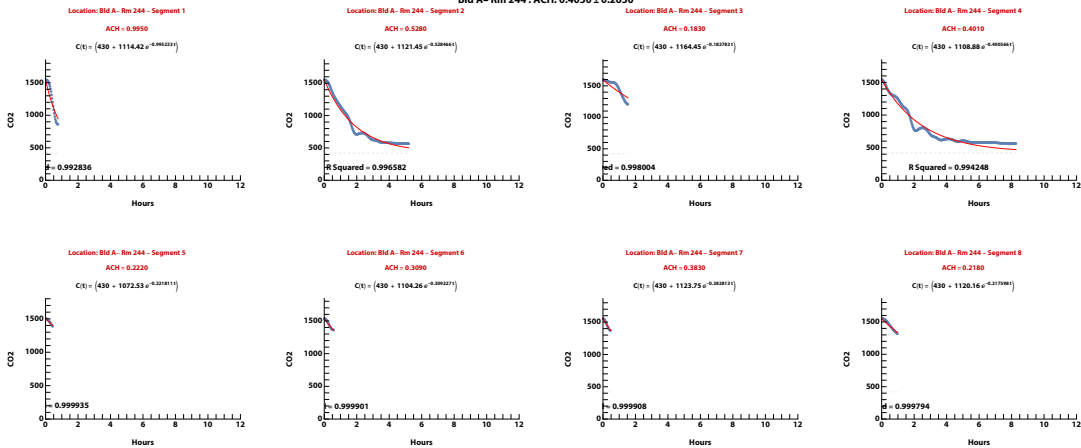

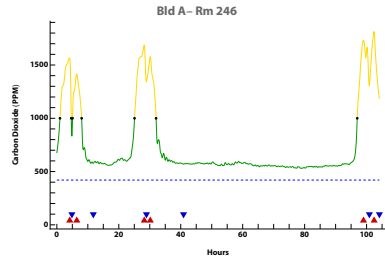

Bid A- Rm 246 : ACH: 0.4700 ± 0.3290

Location: Bid A- Rm 246 - Segment 1  
ACH = 1.1000  
C(t) = (430-1134.46 e<sup>-1.1000t</sup>)

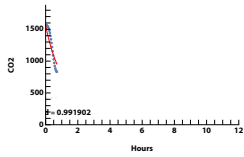

Location: Bid A- Rm 246 - Segment 2  
ACH = 0.4240  
C(t) = (430-984.416 e<sup>-0.4240t</sup>)

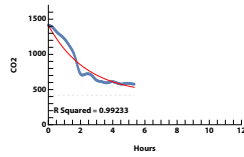

Location: Bid A- Rm 246 - Segment 3  
ACH = 0.4590  
C(t) = (430-1235.66 e<sup>-0.4590t</sup>)

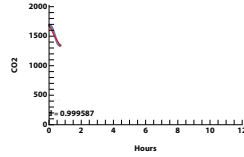

Location: Bid A- Rm 246 - Segment 4  
ACH = 0.3430  
C(t) = (430-1147.29 e<sup>-0.3430t</sup>)

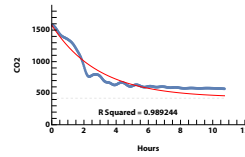

Location: Bid A- Rm 246 - Segment 5  
ACH = 0.1300  
C(t) = (430-1301.59 e<sup>-0.1300t</sup>)

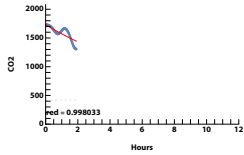

Location: Bid A- Rm 246 - Segment 6  
ACH = 0.3610  
C(t) = (430-1383.23 e<sup>-0.3610t</sup>)

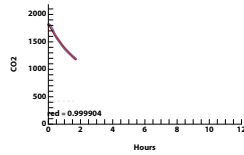

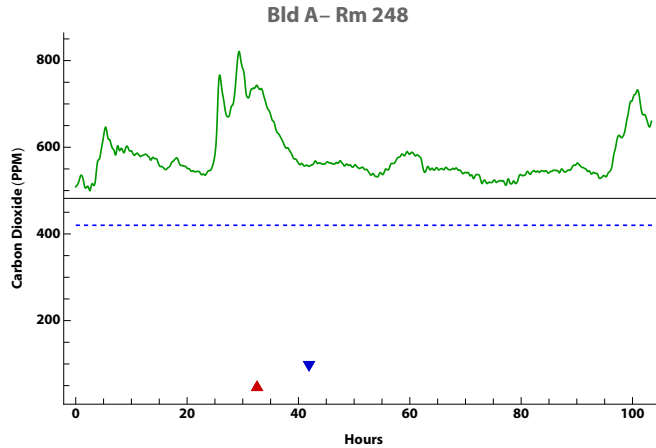

**Bld A- Rm 248 : ACH: 0.1090 ± StandardDeviation[{0.1090}]**

Location: Bld A- Rm 248 - Segment 1

ACH = 0.1090

$$C(t) = (430 + 312.92 e^{-0.109254t})$$

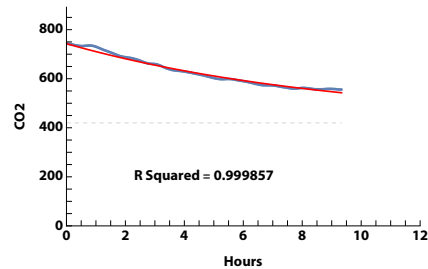

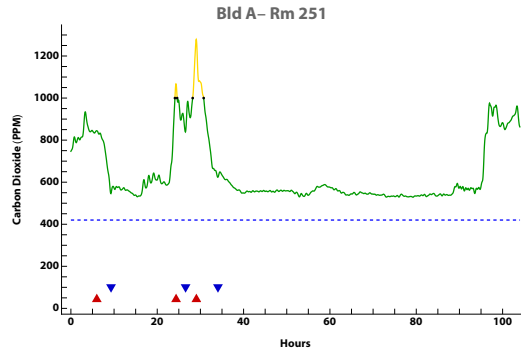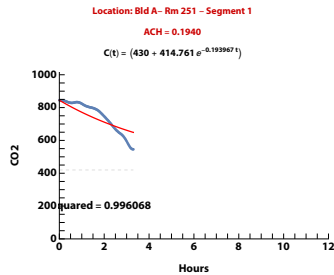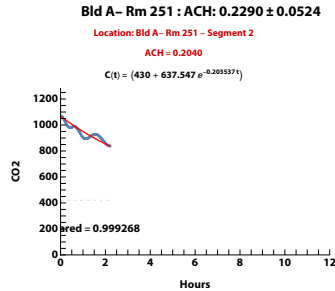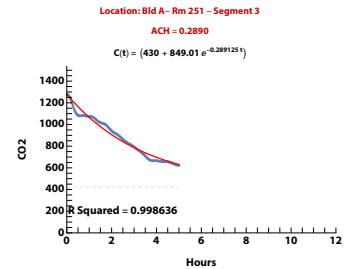

**Zand, et al. (2023). Ventilation during COVID-19 in a school for students with intellectual and developmental disabilities (IDD) [Submitted]**

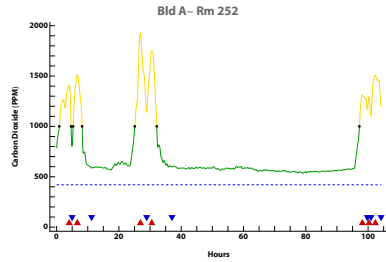

Bid A - Rm 252 : ACH: 0.3640 ± 0.2380

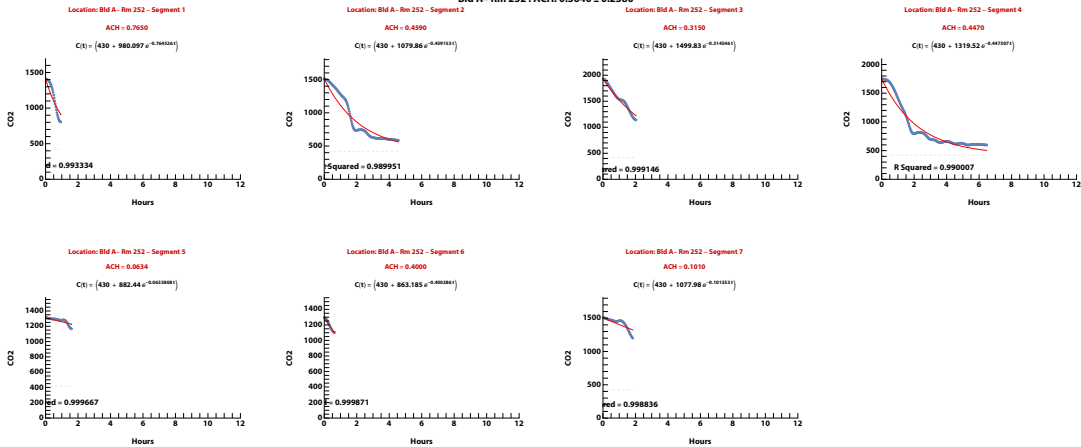

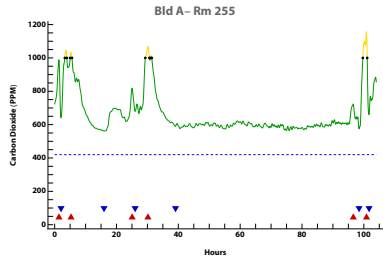

Bid A - Rm 255 : ACH: 0.6450 ± 0.5710

Location: Bid A - Rm 255 - Segment 1  
ACH = 1.3200  
 $C(t) = (430 + 556.837 e^{-1.2209t})$

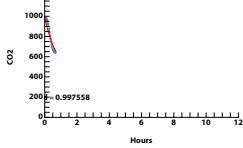

Location: Bid A - Rm 255 - Segment 2  
ACH = 0.1760  
 $C(t) = (430 + 603.09 e^{-0.1760t})$

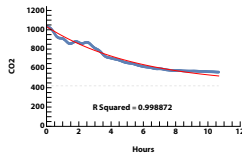

Location: Bid A - Rm 255 - Segment 3  
ACH = 0.4460  
 $C(t) = (430 + 387.923 e^{-0.4460t})$

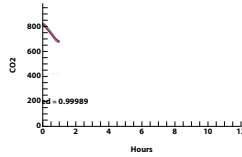

Location: Bid A - Rm 255 - Segment 4  
ACH = 0.1860  
 $C(t) = (430 + 638.911 e^{-0.1860t})$

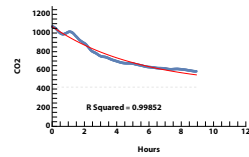

Location: Bid A - Rm 255 - Segment 5  
ACH = 0.3210  
 $C(t) = (430 + 293.438 e^{-0.3210t})$

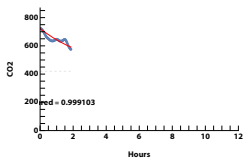

Location: Bid A - Rm 255 - Segment 6  
ACH = 1.4200  
 $C(t) = (430 + 725.264 e^{-1.4200t})$

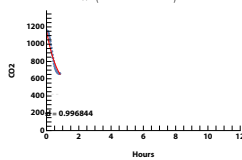



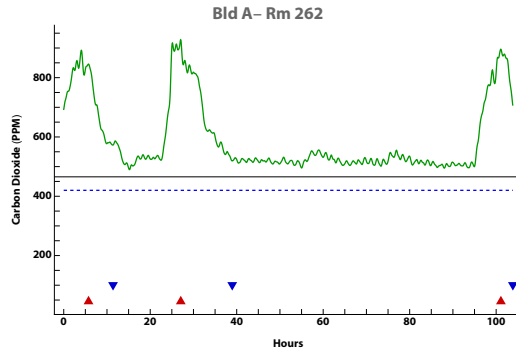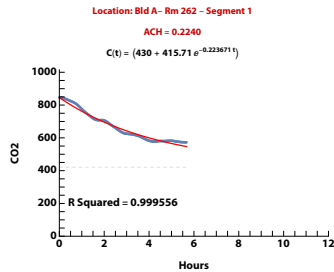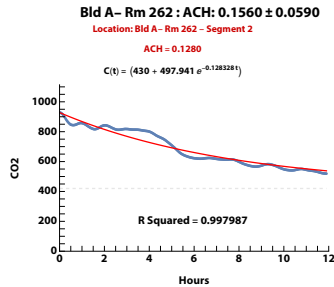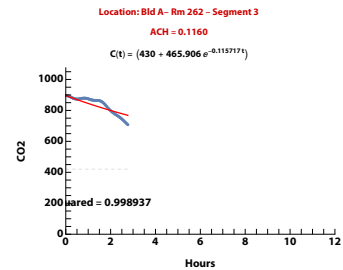

**Zand, et al. (2023). Ventilation during COVID-19 in a school for students with intellectual and developmental disabilities (IDD) [Submitted]**

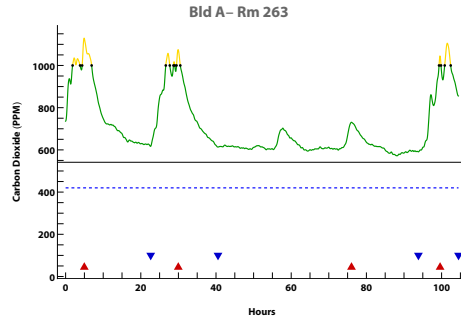

**Bld A- Rm 263 : ACH = 0.0947 ± 0.0385**

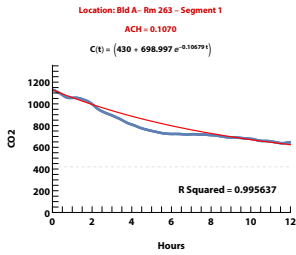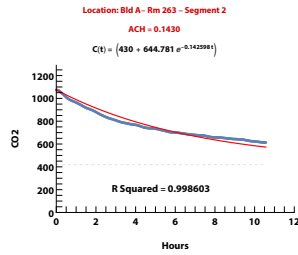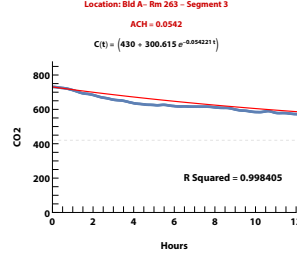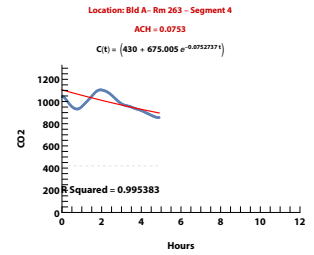

**Zand, et al. (2023). Ventilation during COVID-19 in a school for students with intellectual and developmental disabilities (IDD) [Submitted]**

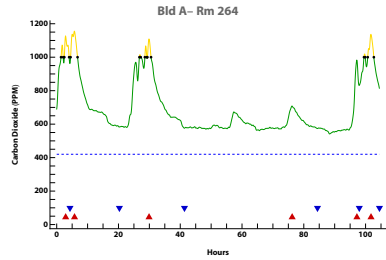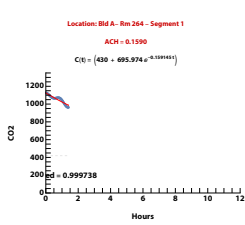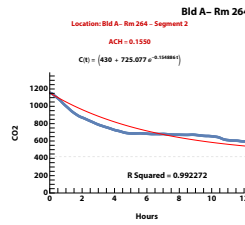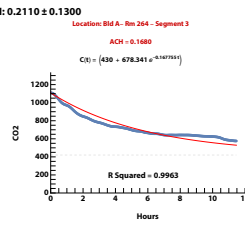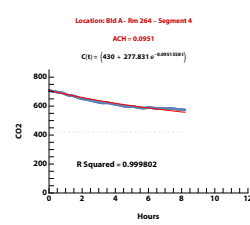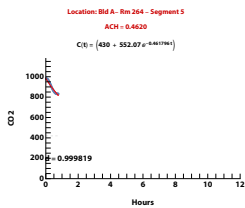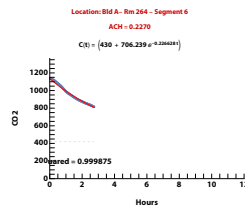

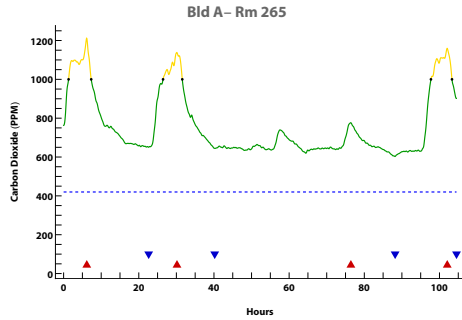

**Bld A- Rm 265 : ACH: 0.1260 ± 0.0467**

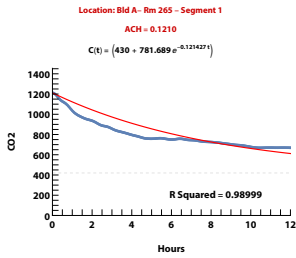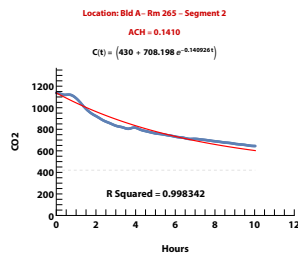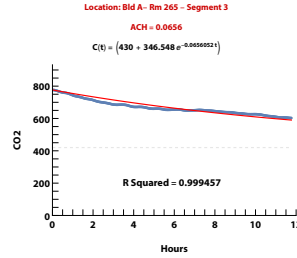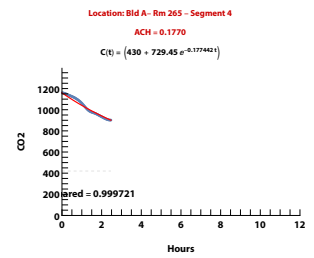

**Zand, et al. (2023). Ventilation during COVID-19 in a school for students with intellectual and developmental disabilities (IDD) [Submitted]**

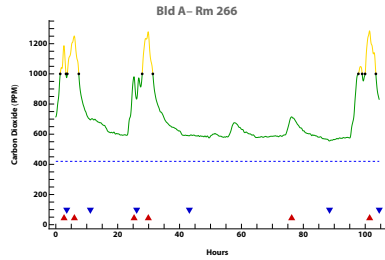

Bid A - Rm 266 : ACH: 0.2580 ± 0.1290

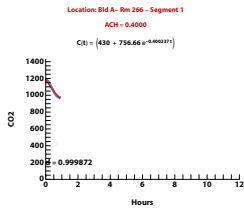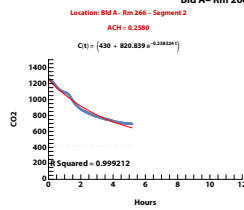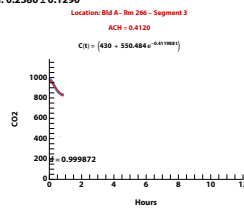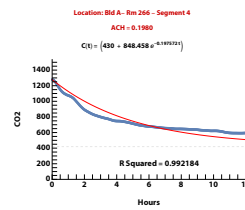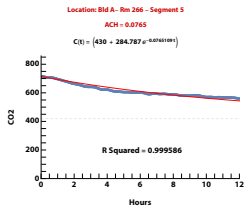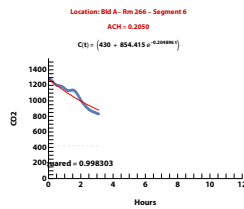

Zand, et al. (2023). Ventilation during COVID-19 in a school for students with intellectual and developmental disabilities (IDD) [Submitted]

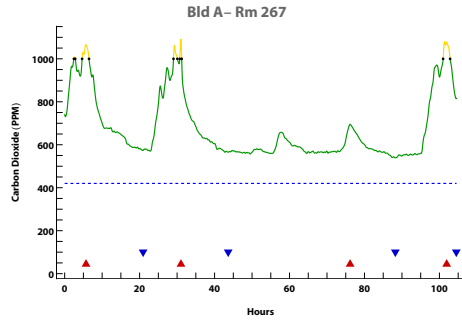

**Bld A - Rm 267 : ACH = 0.1520 ± 0.0527**

Location: Bld A - Rm 267 - Segment 1

ACH = 0.1340

$$C(t) = (430 + 636.17 e^{-0.134234t})$$

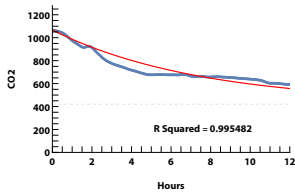

Location: Bld A - Rm 267 - Segment 2

ACH = 0.2020

$$C(t) = (430 + 662.512 e^{-0.202005t})$$

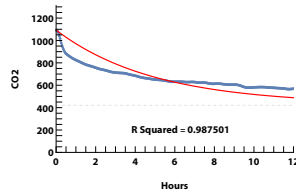

Location: Bld A - Rm 267 - Segment 3

ACH = 0.0859

$$C(t) = (430 + 264.827 e^{-0.085911t})$$

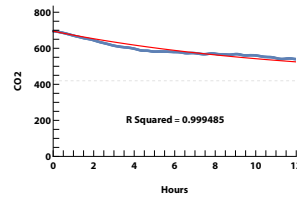

Location: Bld A - Rm 267 - Segment 4

ACH = 0.1860

$$C(t) = (430 + 648.954 e^{-0.185778t})$$

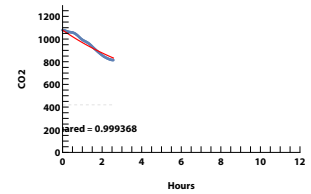

**Zand, et al. (2023). Ventilation during COVID-19 in a school for students with intellectual and developmental disabilities (IDD) [Submitted]**

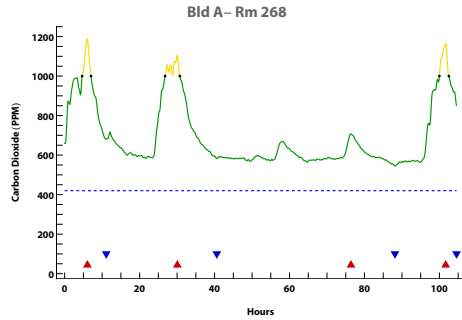

**Bld A - Rm 268 : ACH = 0.1730 ± 0.0683**

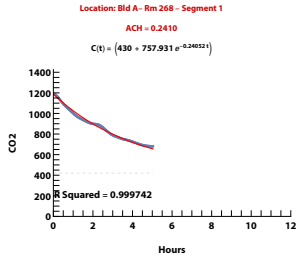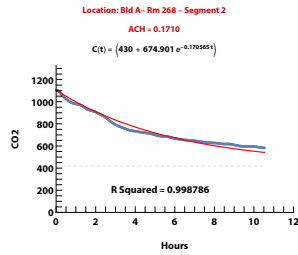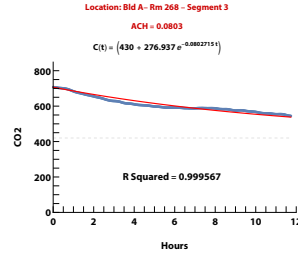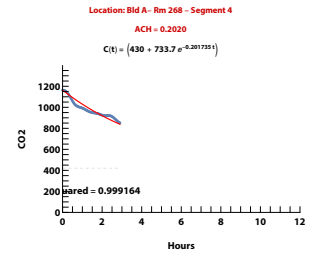

**Zand, et al. (2023). Ventilation during COVID-19 in a school for students with intellectual and developmental disabilities (IDD) [Submitted]**

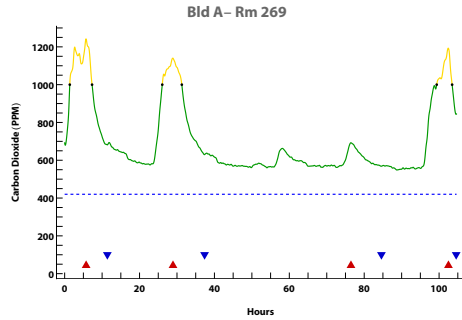

**Bld A - Rm 269 : ACH: 0.1930 ± 0.0910**

Location: Bld A - Rm 269 - Segment 1

ACH = 0.2300

$$C(t) = (430 + 811.863 e^{-0.220466t})$$

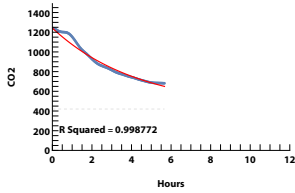

Location: Bld A - Rm 269 - Segment 2

ACH = 0.1500

$$C(t) = (430 + 710.149 e^{-0.149779t})$$

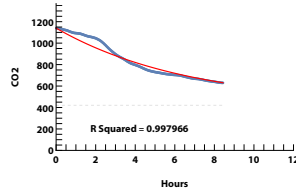

Location: Bld A - Rm 269 - Segment 3

ACH = 0.0913

$$C(t) = (430 + 262.546 e^{-0.0913415t})$$

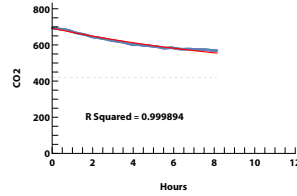

Location: Bld A - Rm 269 - Segment 4

ACH = 0.2990

$$C(t) = (430 + 762.82 e^{-0.2299181t})$$

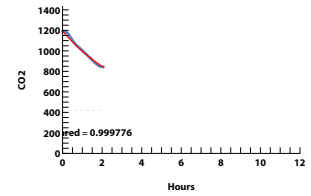

**Zand, et al. (2023). Ventilation during COVID-19 in a school for students with intellectual and developmental disabilities (IDD) [Submitted]**



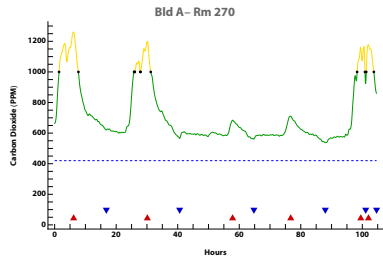

Bid A - Rm 270 : ACH: 0.1410 ± 0.0470

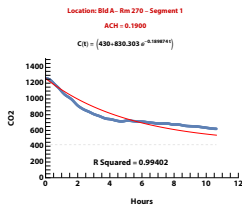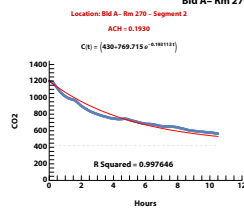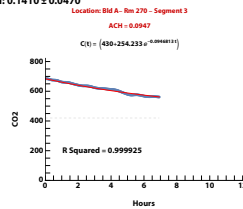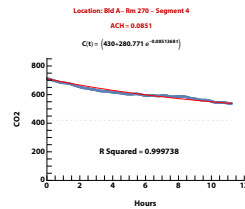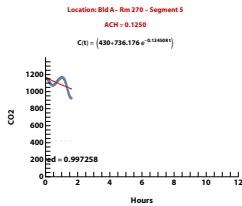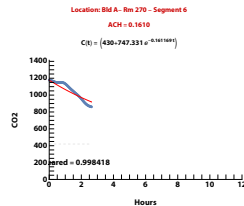

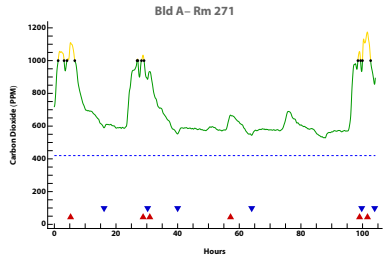

Bid A - Rm 271 : ACH: 0.1990 ± 0.0773

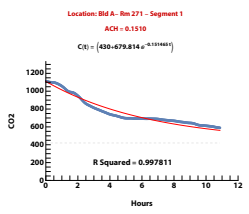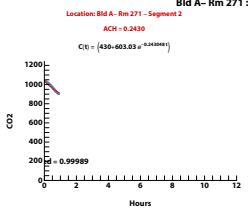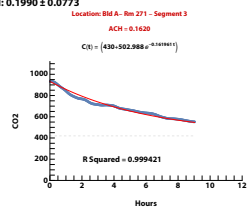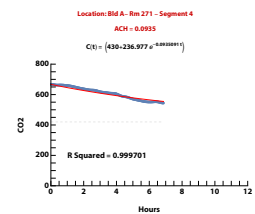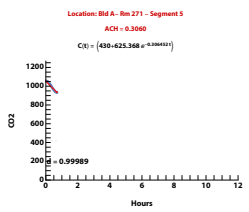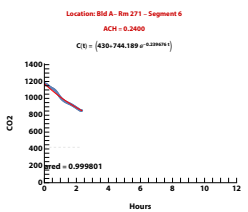

Zand, et al. (2023). Ventilation during COVID-19 in a school for students with intellectual and developmental disabilities (IDD) [Submitted]

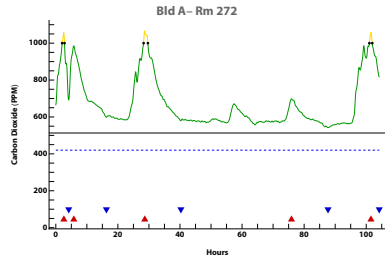

Bid A - Rm 272 : ACH: 0.1980 ± 0.1560

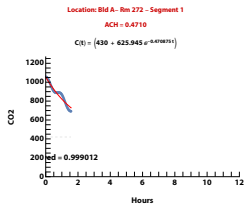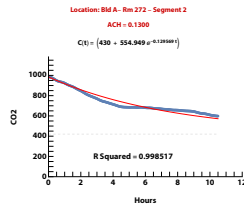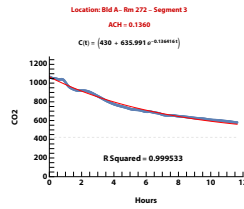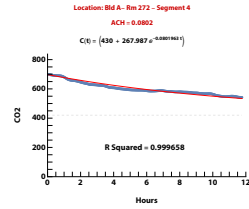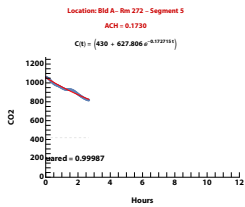

Zand, et al. (2023). Ventilation during COVID-19 in a school for students with intellectual and developmental disabilities (IDD) [Submitted]

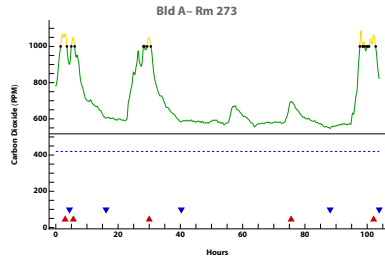

Bid A - Rm 273 : ACH: 0.1700 ± 0.0655

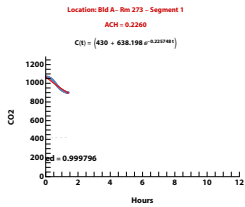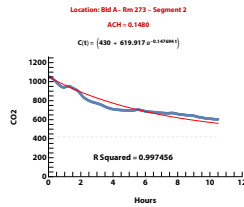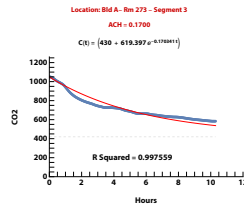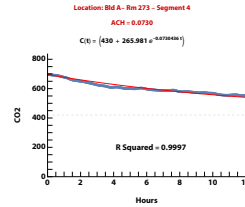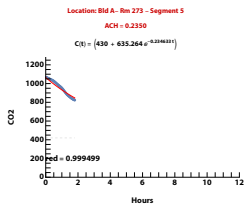

Zand, et al. (2023). Ventilation during COVID-19 in a school for students with intellectual and developmental disabilities (IDD) [Submitted]

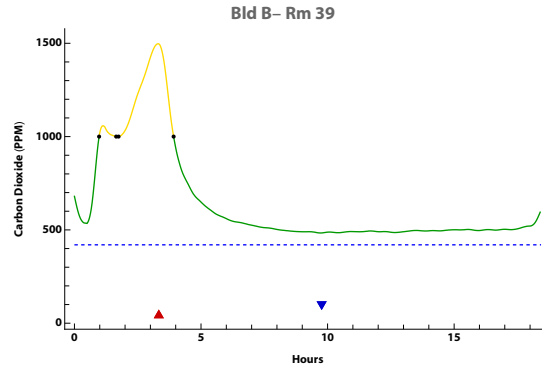

**Bld B- Rm 39 : ACH: 0.8800 ± StandardDeviation[{0.8800}]**

Location: Bld B- Rm 39 - Segment 1

ACH = 0.8800

$$C(t) = (430 + 1067.5 e^{-0.8800t})$$

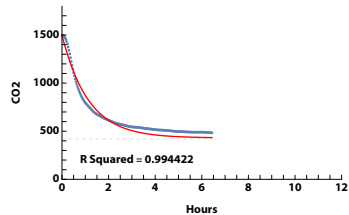

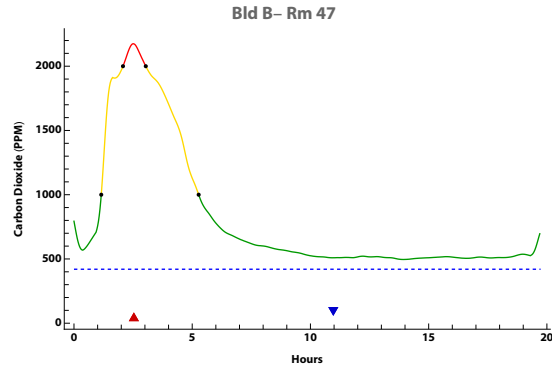

**Bld B- Rm 47 : ACH: 0.3660 ± StandardDeviation[{0.3660}]**

Location: Bld B- Rm 47 - Segment 1

ACH = 0.3660

$$C(t) = (430 + 1744.78 e^{-0.366012t})$$

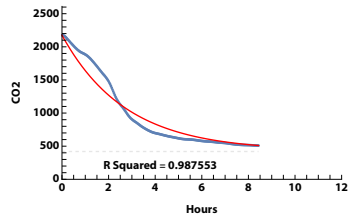

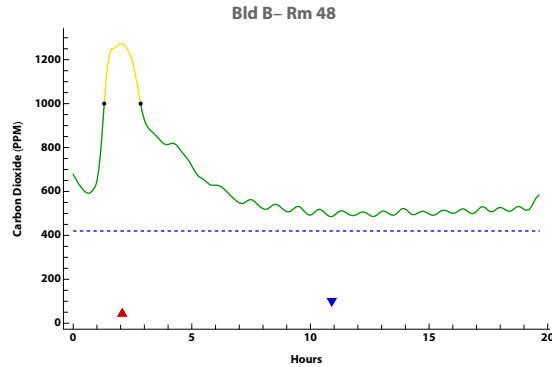

**Bld B- Rm 48 : ACH: 0.3720 ± StandardDeviation[{0.3720}]**

Location: Bld B- Rm 48 - Segment 1

ACH = 0.3720

$$C(t) = (430 + 842.706 e^{-0.372361t})$$

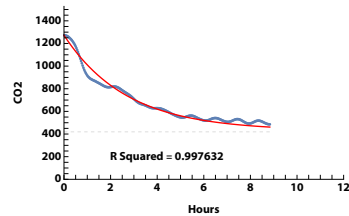

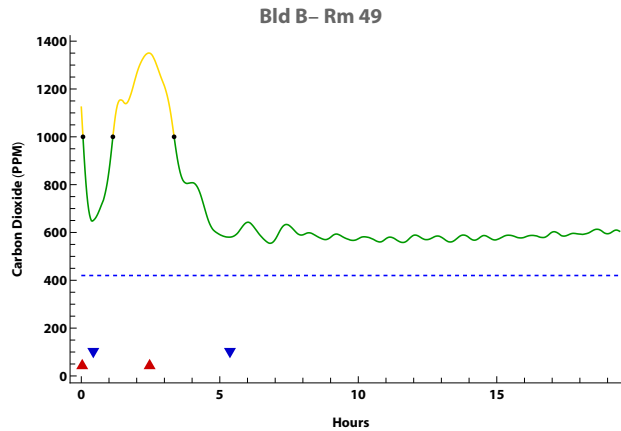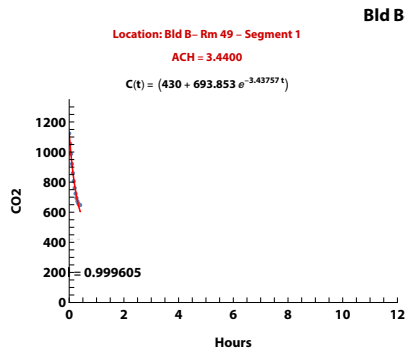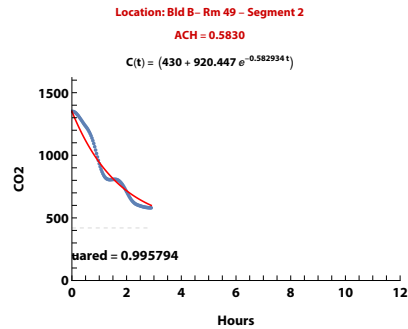

**Zand, et al. (2023). Ventilation during COVID-19 in a school for students with intellectual and developmental disabilities (IDD) [Submitted]**



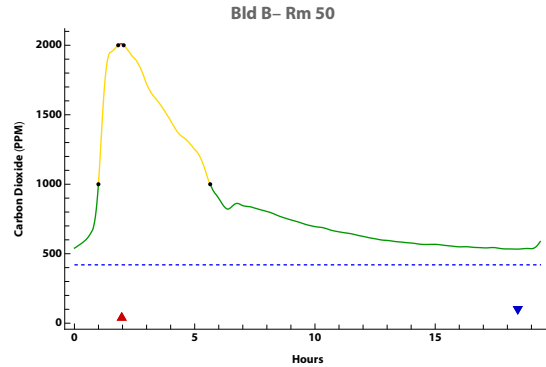

**Bld B- Rm 50 : ACH: 0.2280 ± StandardDeviation[{0.2280}]**

Location: Bld B- Rm 50 - Segment 1

ACH = 0.2280

$C(t) = (430 + 1580.92 e^{-0.227942t})$

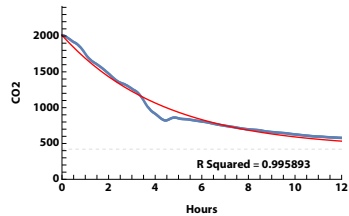

**Zand, et al. (2023). Ventilation during COVID-19 in a school for students with intellectual and developmental disabilities (IDD) [Submitted]**

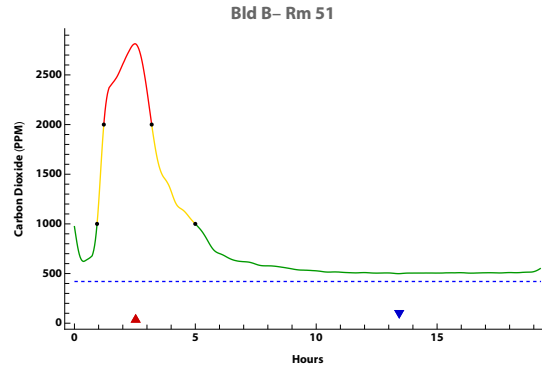

**Bld B- Rm 51 : ACH: 0.5970 ± StandardDeviation[{0.5970}]**

Location: Bld B- Rm 51 - Segment 1

ACH = 0.5970

$C(t) = (430 + 2383.69 e^{-0.596942t})$

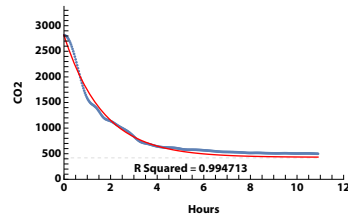

**Zand, et al. (2023). Ventilation during COVID-19 in a school for students with intellectual and developmental disabilities (IDD) [Submitted]**

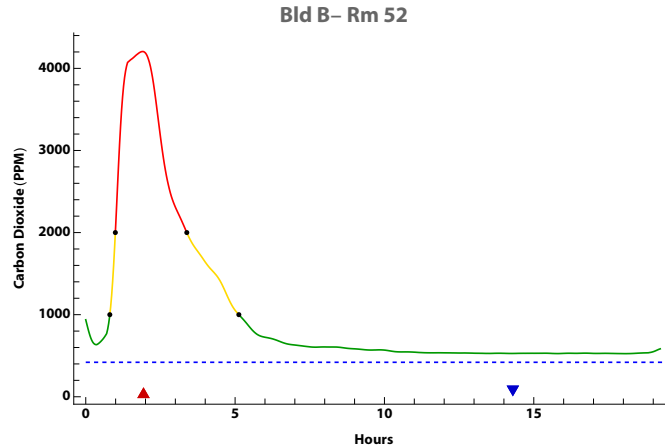

**Bld B- Rm 52 : ACH: 0.5630 ± StandardDeviation[{0.5630}]**

Location: Bld B- Rm 52 - Segment 1

ACH = 0.5630

$$C(t) = (430 + 3775.28 e^{-0.563126t})$$

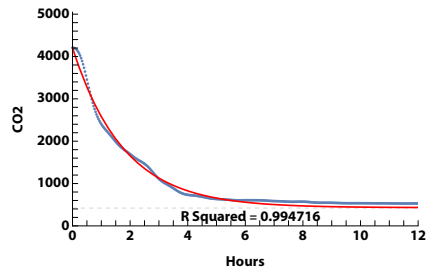

**Zand, et al. (2023). Ventilation during COVID-19 in a school for students with intellectual and developmental disabilities (IDD) [Submitted]**

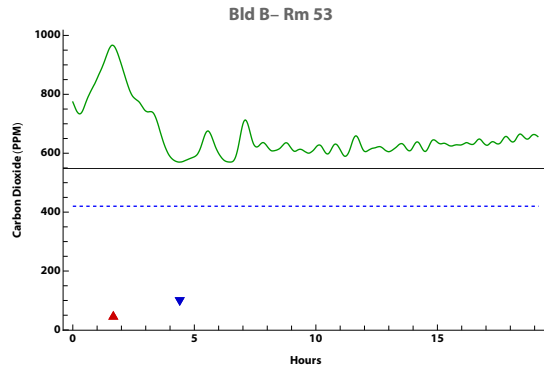

**Bld B- Rm 53 : ACH: 0.4290 ± StandardDeviation[[0.4290]]**

Location: Bld B- Rm 53 - Segment 1

ACH = 0.4290

$$C(t) = (430 + 536.806 e^{-0.42877t})$$

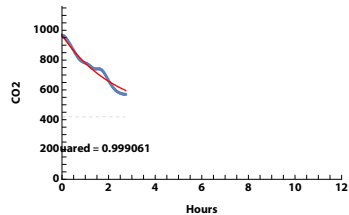

**Bld B- Rm 54**

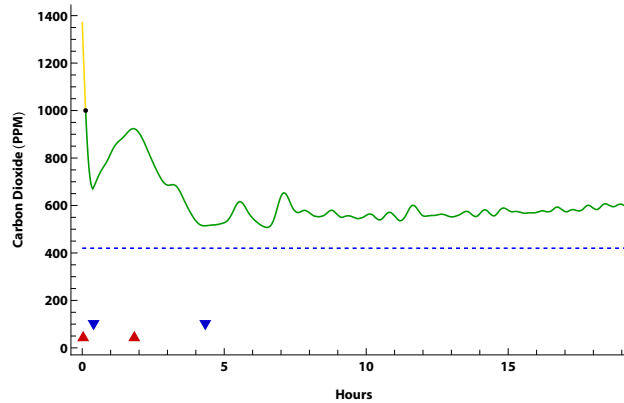

**Bld B- Rm 54 : ACH: 2.3900 ± 2.5900**

Location: Bld B- Rm 54 - Segment 1

ACH = 4.2200

$$C(t) = (430 + 941.068 e^{-4.21956t})$$

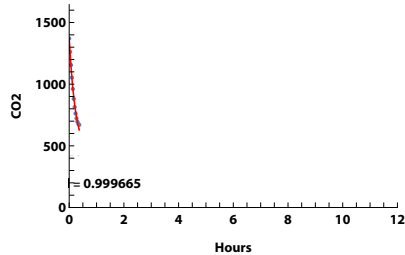

Location: Bld B- Rm 54 - Segment 2

ACH = 0.5520

$$C(t) = (430 + 493.865 e^{-0.551901t})$$

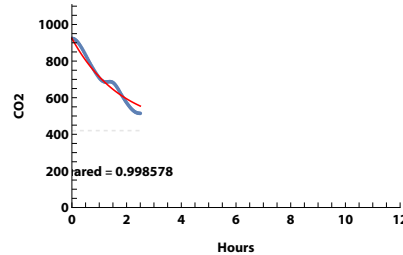

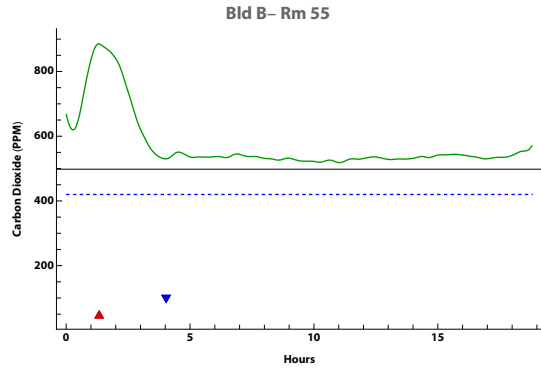

**Bid B- Rm 55 : ACH: 0.4470 ± StandardDeviation[{0.4470}]**

Location: Bid B- Rm 55 - Segment 1

ACH = 0.4470

$$C(t) = (430 + 455.728 e^{-0.446664t})$$

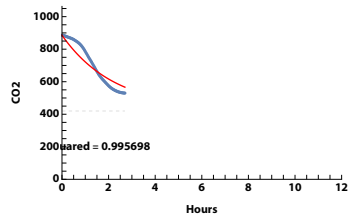

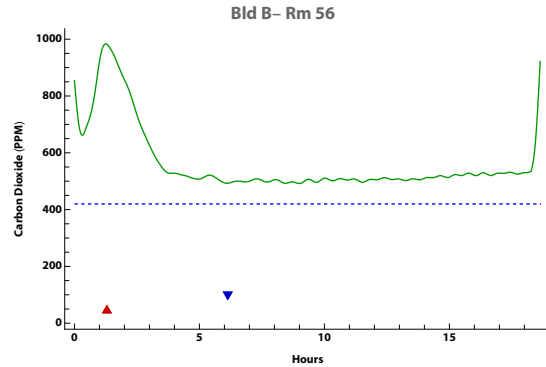

**Bld B- Rm 56 : ACH: 0.5400 ± StandardDeviation[{0.5400}]**

Location: Bld B- Rm 56 - Segment 1

ACH = 0.5400

$$C(t) = (430 + 553.917 e^{-0.339578t})$$

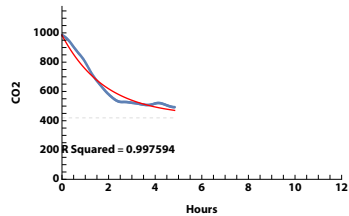

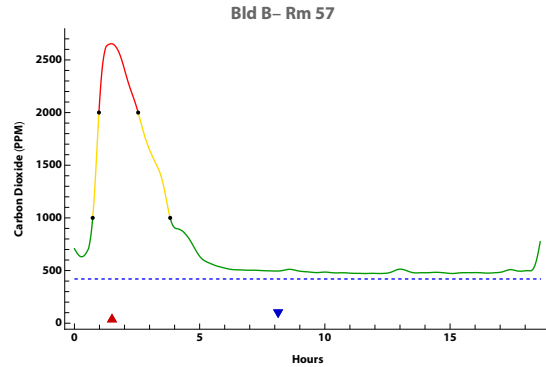

**Bld B- Rm 57 : ACH: 0.5000 ± StandardDeviation[[0.5000]]**

Location: Bld B- Rm 57 - Segment 1

ACH = 0.5000

$C(t) = (430 + 2223.49 e^{-0.499937 t})$

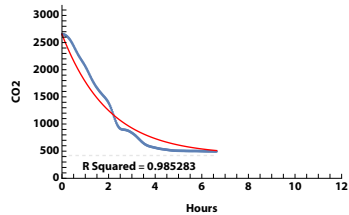



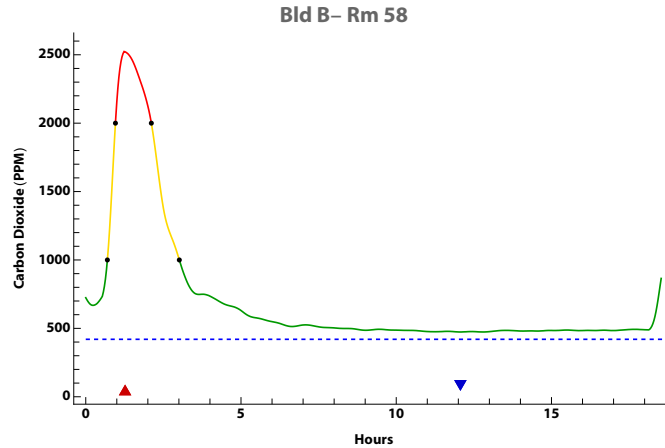

**Bld B- Rm 58 : ACH: 0.6080 ± StandardDeviation[{0.6080}]**

Location: Bld B- Rm 58 - Segment 1

ACH = 0.6080

$$C(t) = (430 + 2093.7 e^{-0.608253t})$$

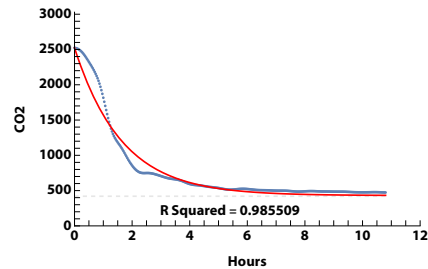

**Zand, et al. (2023). Ventilation during COVID-19 in a school for students with intellectual and developmental disabilities (IDD) [Submitted]**

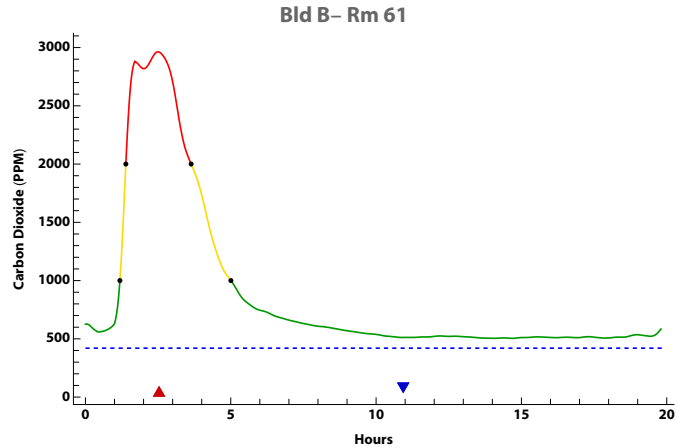

**Bld B- Rm 61 : ACH: 0.5130 ± StandardDeviation[{0.5130}]**

Location: Bld B- Rm 61 - Segment 1

ACH = 0.5130

$$C(t) = (430 + 2533.13 e^{-0.513013 t})$$

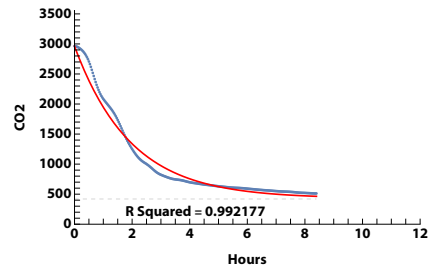

**Zand, et al. (2023). Ventilation during COVID-19 in a school for students with intellectual and developmental disabilities (IDD) [Submitted]**

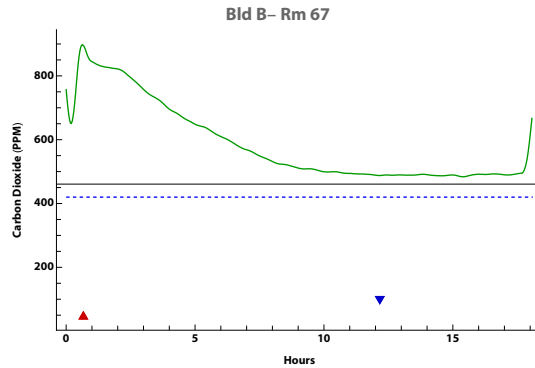

**Bld B- Rm 67 : ACH : 0.1830 ± StandardDeviation[{0.1830}]**

Location: Bld B- Rm 67 - Segment 1

ACH = 0.1830

$$C(t) = (430 + 467.531 e^{-0.18263 t})$$

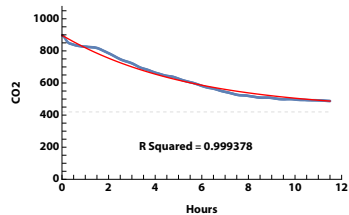

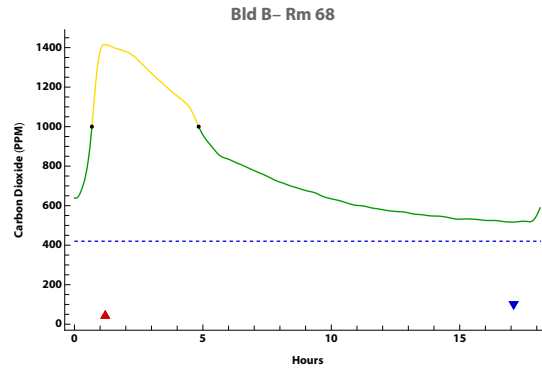

**Bld B- Rm 68 : ACH : 0.1630 ± StandardDeviation[[0.1630]]**

Location: Bld B- Rm 68 - Segment 1

ACH = 0.1630

$$C(t) = (430 + 984.454 e^{-0.163495t})$$

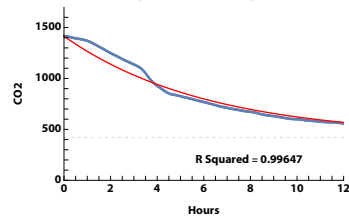

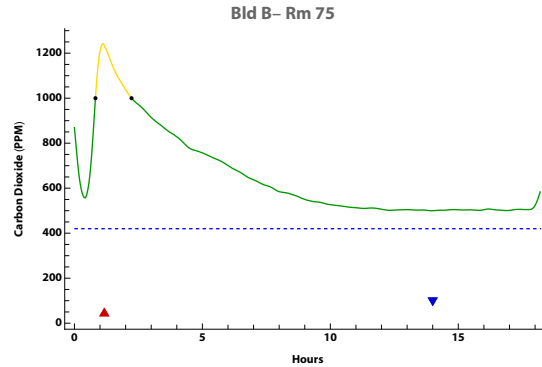

**Bld B- Rm 75 : ACH: 0.2400 ± StandardDeviation[{0.2400}]**

Location: Bld B- Rm 75 - Segment 1

ACH = 0.2400

$$C(t) = (430 + 811.872 e^{-0.239731t})$$

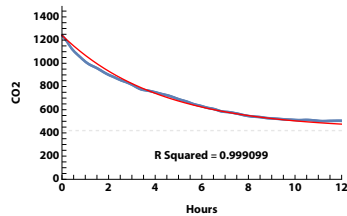

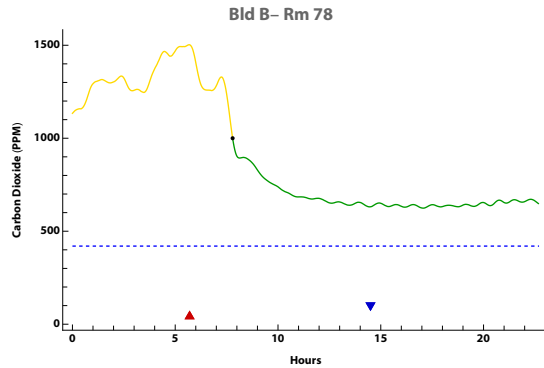

**Bld B- Rm 78 : ACH: 0.2540 ± StandardDeviation[{0.2540}]**

Location: Bld B- Rm 78 - Segment 1

ACH = 0.2540

$$C(t) = (430 + 1072.69 e^{-0.254491t})$$

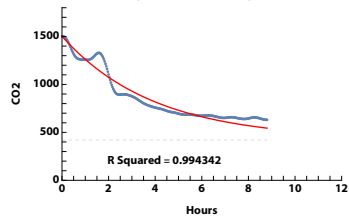

**Zand, et al. (2023). Ventilation during COVID-19 in a school for students with intellectual and developmental disabilities (IDD) [Submitted]**

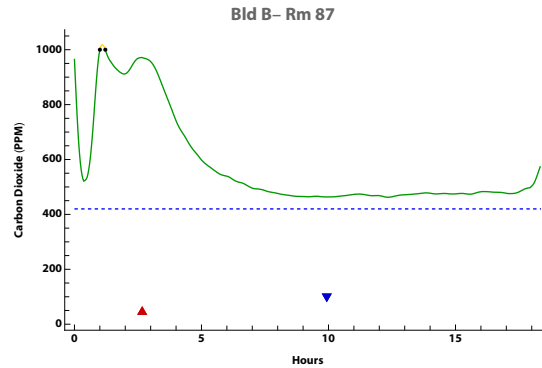

**Bld B- Rm 87 : ACH: 0.4420 ± StandardDeviation[{0.4420}]**

Location: Bld B- Rm 87 - Segment 1

ACH = 0.4420

$C(t) = (430 + 541.588 e^{-0.442369t})$

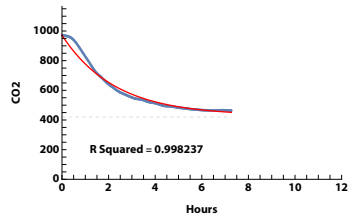

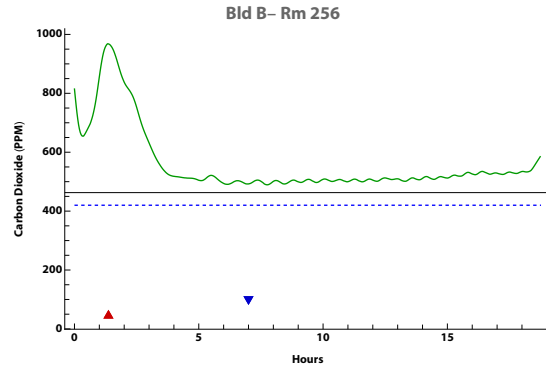

**Bld B- Rm 256 : ACH: 0.5370 ± StandardDeviation[{0.5370}]**

Location: Bld B- Rm 256 - Segment 1

ACH = 0.5370

$C(t) = (430 + 538.198 e^{-0.536862t})$

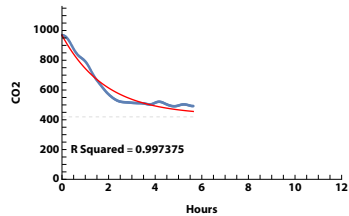

**Zand, et al. (2023). Ventilation during COVID-19 in a school for students with intellectual and developmental disabilities (IDD) [Submitted]**



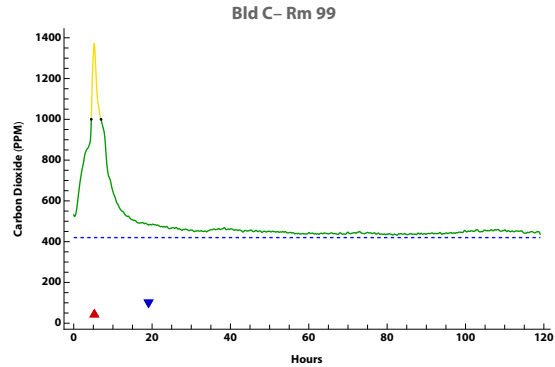

**Bld C- Rm 99 : ACH: 0.2890 ± StandardDeviation[{0.2890}]**

Location: Bld C- Rm 99 - Segment 1

ACH = 0.2890

$C(t) = (430 + 940.736 e^{-0.288929t})$

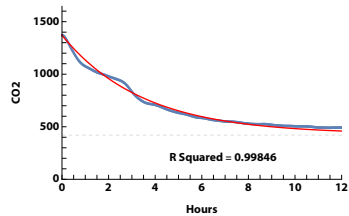

**Zand, et al. (2023). Ventilation during COVID-19 in a school for students with intellectual and developmental disabilities (IDD) [Submitted]**

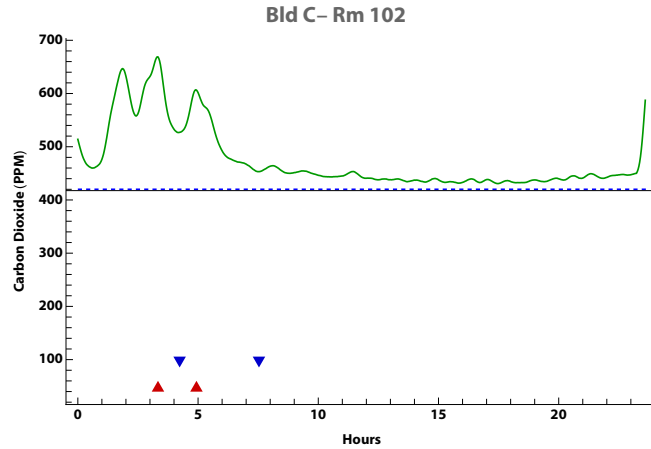

**Bld C- Rm 102 : ACH: 1.1700 ± StandardDeviation[1.1700]**

Location: Bld C- Rm 102 - Segment 1

ACH = 1.1700

$$C(t) = (430 + 238.825 e^{-1.16898t})$$

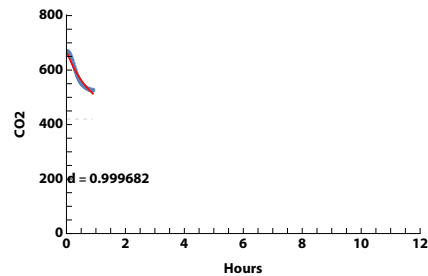

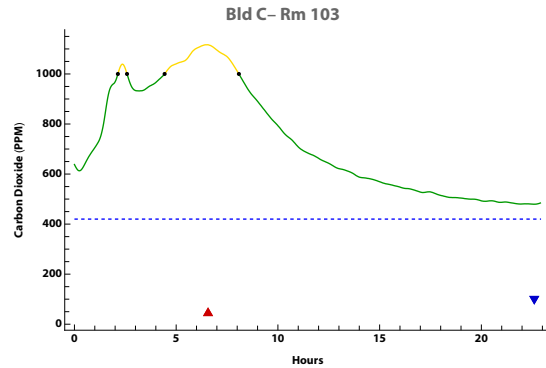

**Bid C- Rm 103 : ACH: 0.1840 ± StandardDeviation[0.1840]**

Location: Bid C- Rm 103 - Segment 1

ACH = 0.1840

$$C(t) = (430 + 686.715 e^{-0.183721t})$$

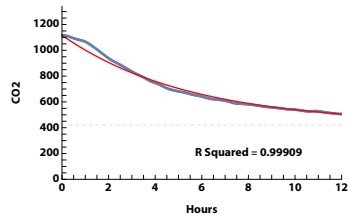

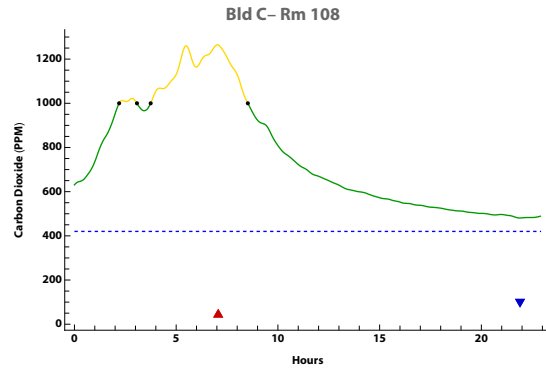

**Bld C- Rm 108 : ACH: 0.2340 ± StandardDeviation[0.2340]**

Location: Bld C- Rm 108 - Segment 1

ACH = 0.2340

$C(t) = (430 + 834.998 e^{-0.234357t})$

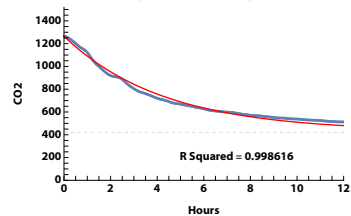

**Zand, et al. (2023). Ventilation during COVID-19 in a school for students with intellectual and developmental disabilities (IDD) [Submitted]**

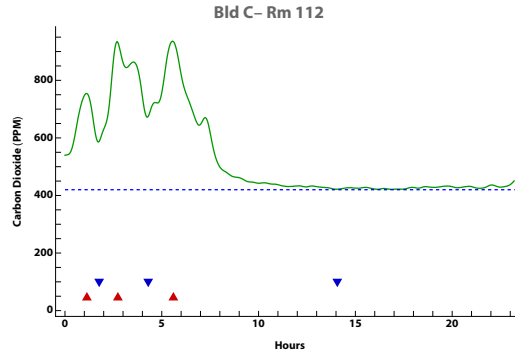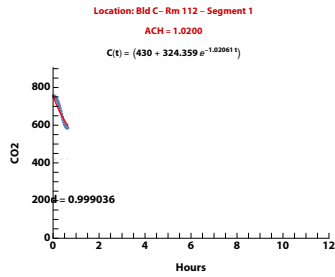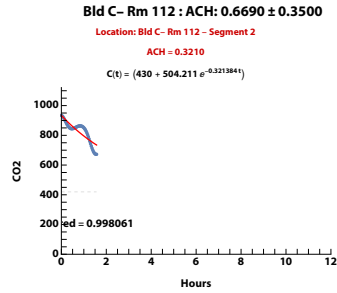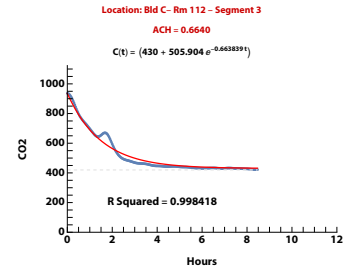

**Zand, et al. (2023). Ventilation during COVID-19 in a school for students with intellectual and developmental disabilities (IDD) [Submitted]**

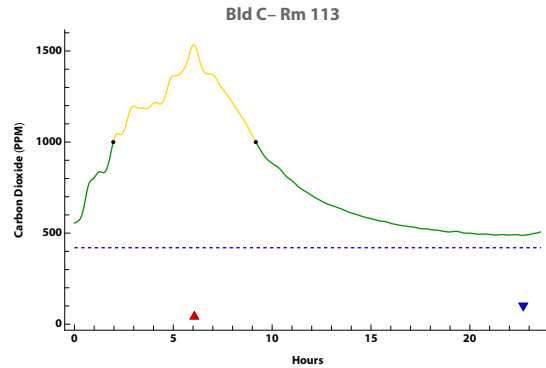

**Bld C- Rm 113 : ACH: 0.2160 ± StandardDeviation[0.2160]**

Location: Bld C- Rm 113 - Segment 1

ACH = 0.2160

$C(t) = (430 + 1104.33 e^{-0.215793t})$

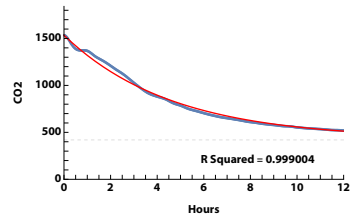

**Zand, et al. (2023). Ventilation during COVID-19 in a school for students with intellectual and developmental disabilities (IDD) [Submitted]**

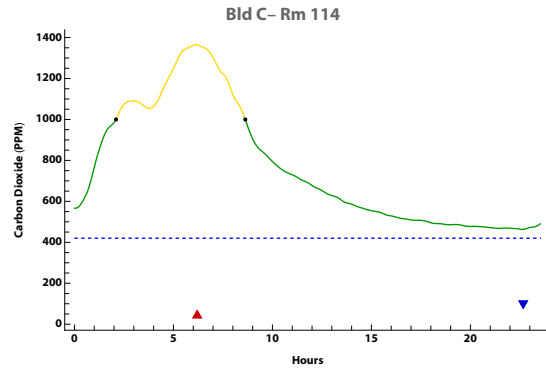

**Bld C- Rm 114 : ACH: 0.2220 ± StandardDeviation{0.2220}**

Location: Bld C- Rm 114 - Segment 1

ACH = 0.2220

$C(t) = (430 + 934.813 e^{-0.221934t})$

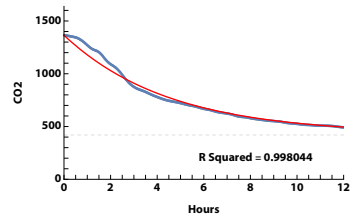

**Zand, et al. (2023). Ventilation during COVID-19 in a school for students with intellectual and developmental disabilities (IDD) [Submitted]**

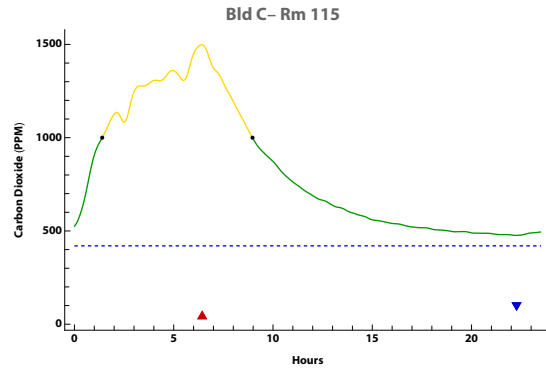

**Bld C- Rm 115 : ACH: 0.2400 ± StandardDeviation[0.2400]**

Location: Bld C- Rm 115 - Segment 1

ACH = 0.2400

$$C(t) = (430 + 1068.21 e^{-0.239725t})$$

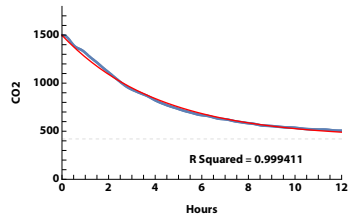

**Zand, et al. (2023). Ventilation during COVID-19 in a school for students with intellectual and developmental disabilities (IDD) [Submitted]**



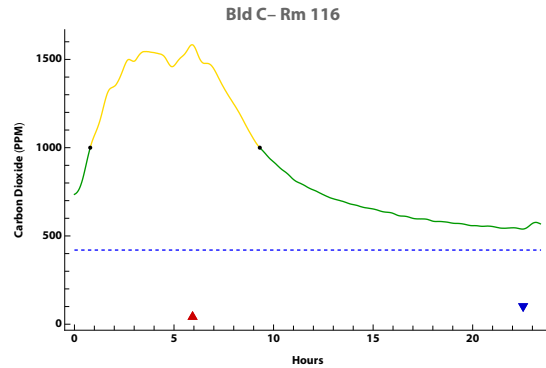

**Bld C- Rm 116 : ACH: 0.1850 ± StandardDeviation[0.1850]**

Location: Bld C- Rm 116 - Segment 1

ACH = 0.1850

$C(t) = (430 + 1153.12 e^{-0.185141t})$

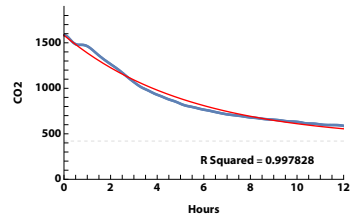

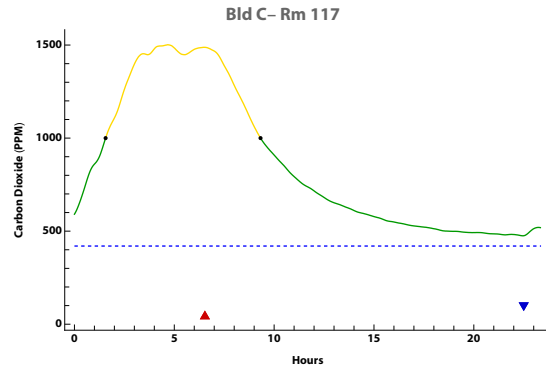

**Bld C- Rm 117 : ACH: 0.2220 ± StandardDeviation[0.2220]**

Location: Bld C- Rm 117 - Segment 1

ACH = 0.2220

$$C(t) = (430 + 1057.89 e^{-0.221497t})$$

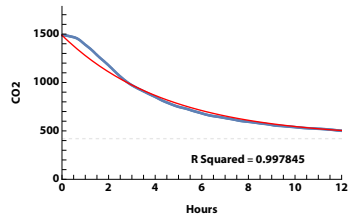

**Zand, et al. (2023). Ventilation during COVID-19 in a school for students with intellectual and developmental disabilities (IDD) [Submitted]**

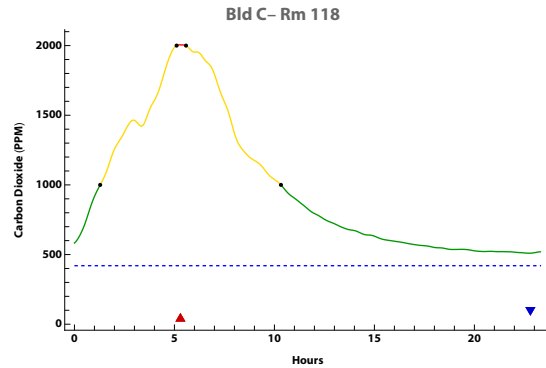

**Bld C- Rm 118 : ACH: 0.1960 ± StandardDeviation[0.1960]**

Location: Bld C- Rm 118 - Segment 1

ACH = 0.1960

$$C(t) = (430 + 1576.05 e^{-0.196478t})$$

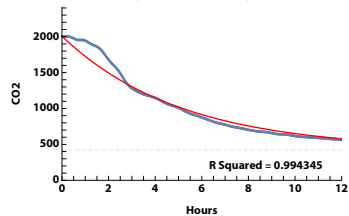

**Zand, et al. (2023). Ventilation during COVID-19 in a school for students with intellectual and developmental disabilities (IDD) [Submitted]**

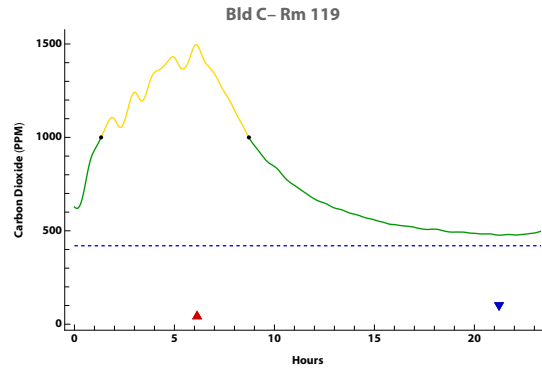

**Bld C- Rm 119 : ACH: 0.2370 ± StandardDeviation[0.2370]**

Location: Bld C- Rm 119 - Segment 1

ACH = 0.2370

$$C(t) = (430 + 1065.92 e^{-0.237473t})$$

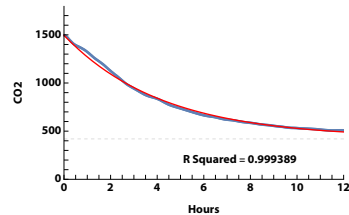

**Zand, et al. (2023). Ventilation during COVID-19 in a school for students with intellectual and developmental disabilities (IDD) [Submitted]**

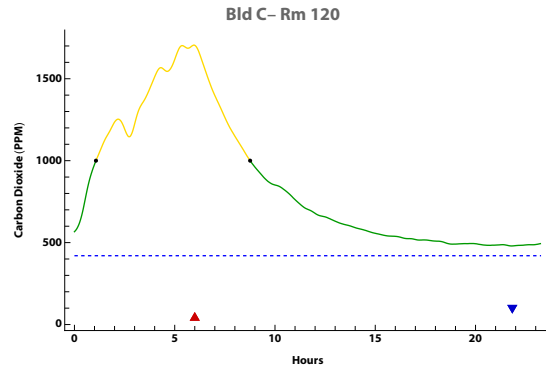

**Bld C- Rm 120 : ACH: 0.2670 ± StandardDeviation[{0.2670}]**

Location: Bld C- Rm 120 - Segment 1

ACH = 0.2670

$C(t) = (430 + 1275.39 e^{-0.266588t})$

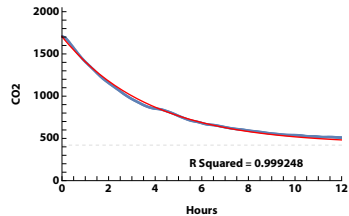

**Zand, et al. (2023). Ventilation during COVID-19 in a school for students with intellectual and developmental disabilities (IDD) [Submitted]**

Bld C- Rm 121

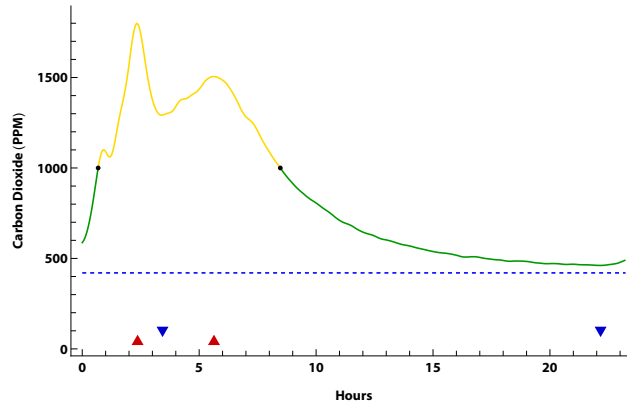

Bld C- Rm 121 : ACH: 0.3640 ± 0.1880

Location: Bld C- Rm 121 - Segment 1

ACH = 0.4970

$$C(t) = (430 + 1368.63 e^{-0.497135t})$$

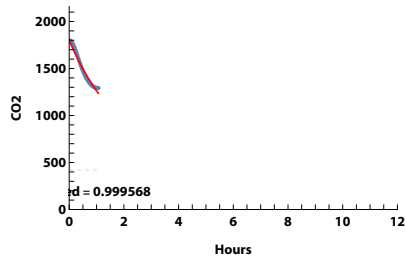

Location: Bld C- Rm 121 - Segment 2

ACH = 0.2310

$$C(t) = (430 + 1075.3 e^{-0.231305t})$$

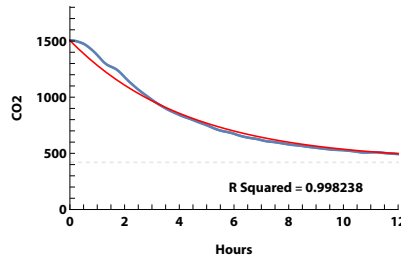

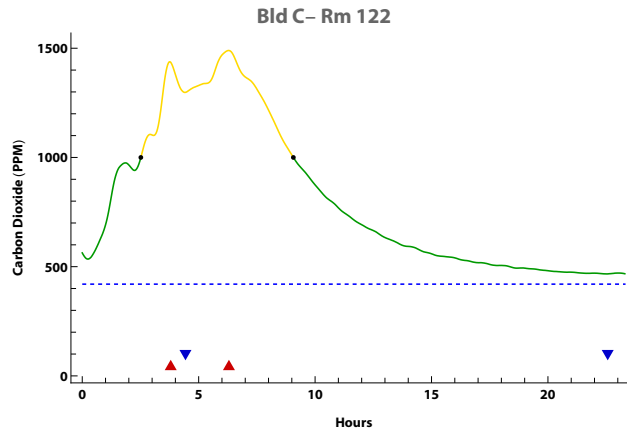

**Bld C- Rm 122 : ACH: 0.2490 ± 0.0287**

Location: Bld C- Rm 122 - Segment 1

ACH = 0.2700

$$C(t) = (430 + 1008.04 e^{-0.269596t})$$

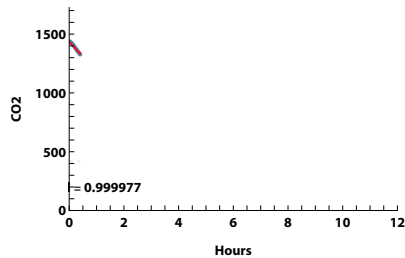

Location: Bld C- Rm 122 - Segment 2

ACH = 0.2290

$$C(t) = (430 + 1059.67 e^{-0.22897t})$$

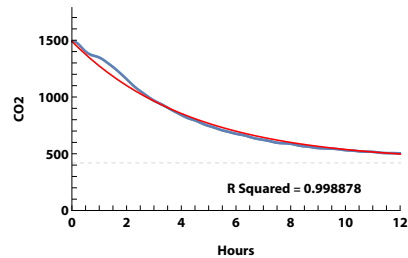

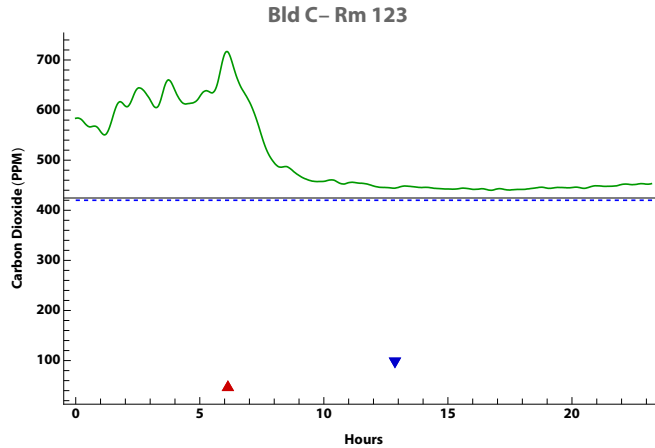

**Bld C – Rm 123 : ACH: 0.6210 ± StandardDeviation[{0.6210}]**

Location: Bld C- Rm 123 – Segment 1

ACH = 0.6210

$$C(t) = (430 + 286.91 e^{-0.62071 t})$$

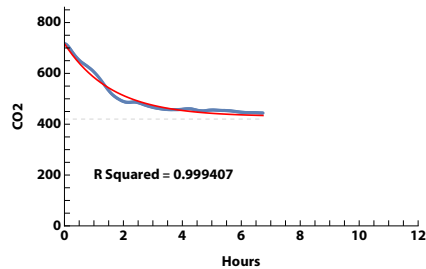

**Zand, et al. (2023). Ventilation during COVID–19 in a school for students with intellectual and developmental disabilities (IDD) [Submitted]**



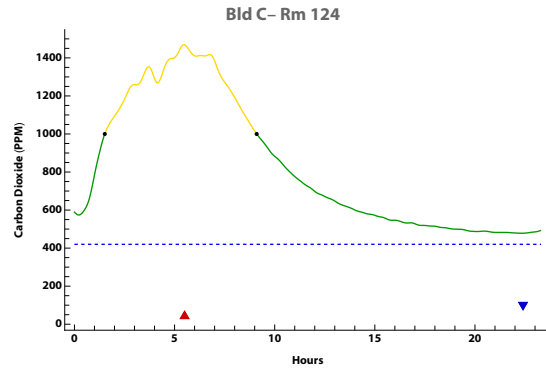

**Bld C- Rm 124 : ACH: 0.1850 ± StandardDeviation[0.1850]**

Location: Bld C- Rm 124 - Segment 1

ACH = 0.1850

$C(t) = (430 + 1039.02 e^{-0.185233t})$

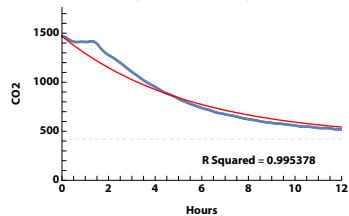

**Zand, et al. (2023). Ventilation during COVID-19 in a school for students with intellectual and developmental disabilities (IDD) [Submitted]**

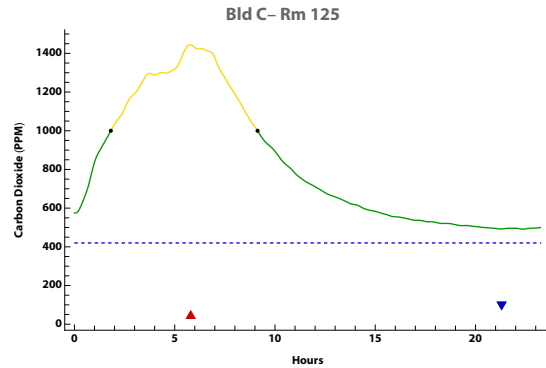

**Bld C- Rm 125 : ACH: 0.1880 ± StandardDeviation[0.1880]**

Location: Bld C- Rm 125 - Segment 1

ACH = 0.1880

$$C(t) = (430 + 1014.52 e^{-0.187799t})$$

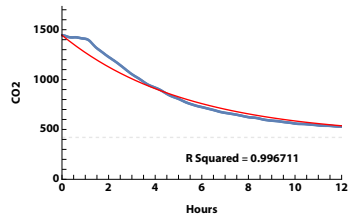

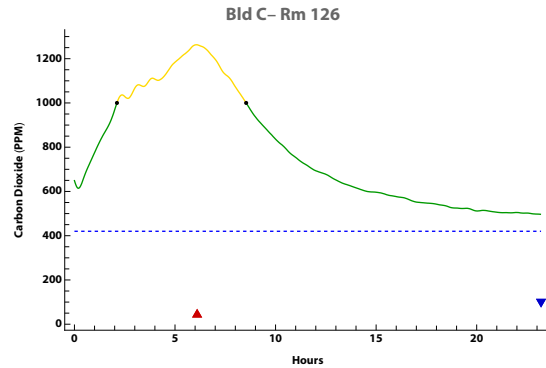

**Bld C- Rm 126 : ACH: 0.1760 ± StandardDeviation[{0.1760}]**

Location: Bld C- Rm 126 - Segment 1

ACH = 0.1760

$$C(t) = (430 + 832.989 e^{-0.175798t})$$

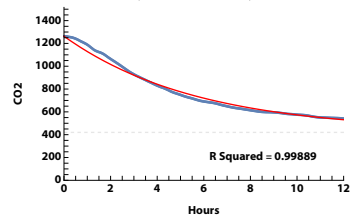

**Zand, et al. (2023). Ventilation during COVID-19 in a school for students with intellectual and developmental disabilities (IDD) [Submitted]**

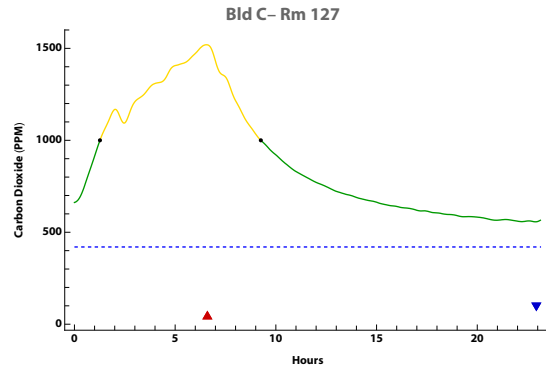

**Bld C- Rm 127 : ACH: 0.1930 ± StandardDeviation[0.1930]**

Location: Bld C- Rm 127 - Segment 1

ACH = 0.1930

$$C(t) = (430 + 1089.66 e^{-0.199432t})$$

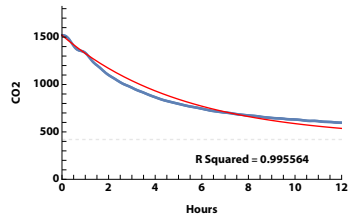

**Zand, et al. (2023). Ventilation during COVID-19 in a school for students with intellectual and developmental disabilities (IDD) [Submitted]**

Bld C- Rm 128

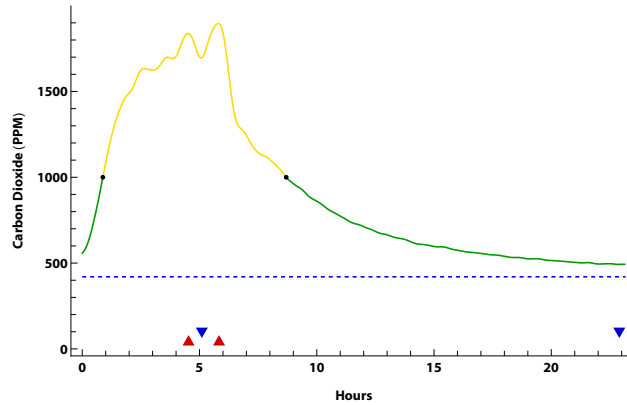

Bld C- Rm 128 : ACH: 0.2400 ± 0.0784

Location: Bld C- Rm 128 - Segment 1

ACH = 0.1850

$$C(t) = (430 + 1407.86 e^{-0.184769t})$$

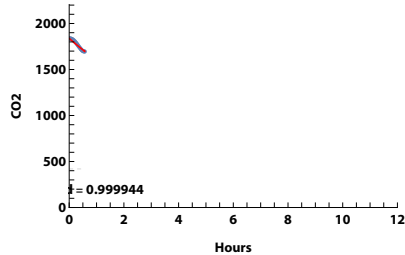

Location: Bld C- Rm 128 - Segment 2

ACH = 0.2960

$$C(t) = (430 + 1466.12 e^{-0.295643t})$$

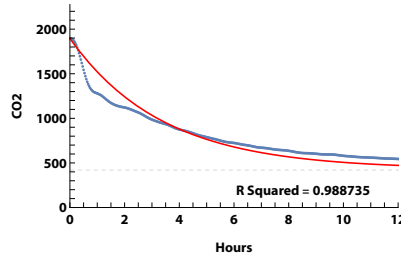

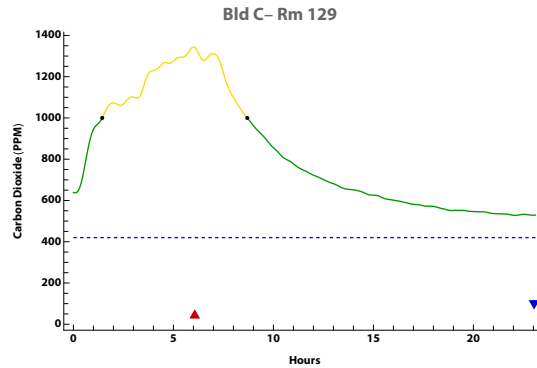

**Bld C- Rm 129 : ACH: 0.1710 ± StandardDeviation[0.1710]**

Location: Bld C- Rm 129 - Segment 1

ACH = 0.1710

$$C(t) = (430 + 913.034 e^{-0.171331t})$$

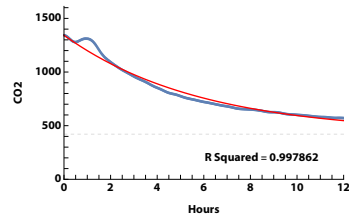

**Zand, et al. (2023). Ventilation during COVID-19 in a school for students with intellectual and developmental disabilities (IDD) [Submitted]**

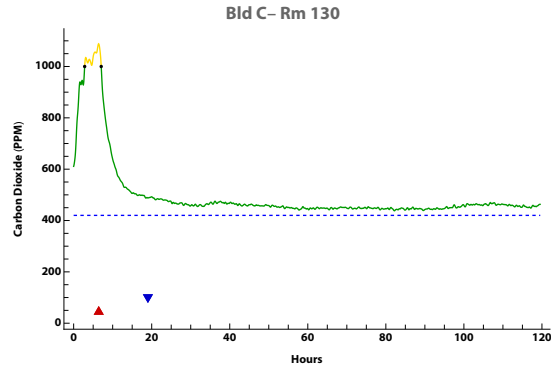

**Bld C- Rm 130 : ACH: 0.2920 ± StandardDeviation[0.2920]**

Location: Bld C- Rm 130 - Segment 1

ACH = 0.2920

$C(t) = (430 + 658.586 e^{-0.291554t})$

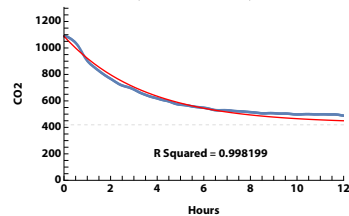

**Zand, et al. (2023). Ventilation during COVID-19 in a school for students with intellectual and developmental disabilities (IDD) [Submitted]**

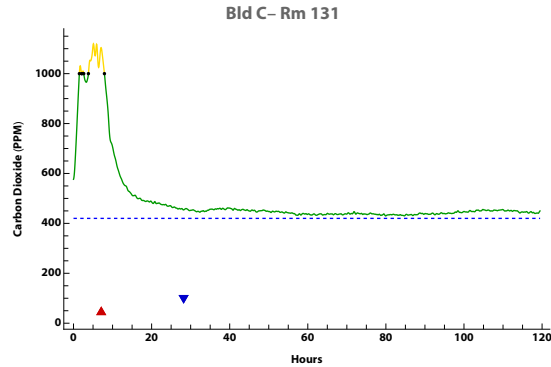

**Bld C- Rm 131 : ACH: 0.2690 ± StandardDeviation[0.2690]**

Location: Bld C- Rm 131 - Segment 1

ACH = 0.2690

$$C(t) = (430 + 674.407 e^{-0.269271t})$$

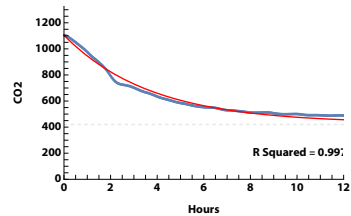



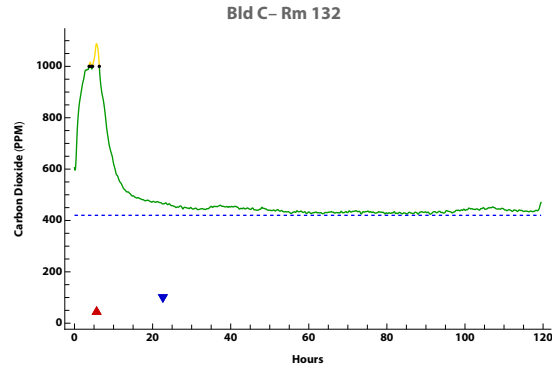

**Bld C- Rm 132 : ACH: 0.2600 ± StandardDeviation[{0.2600}]**

Location: Bld C- Rm 132 - Segment 1

ACH = 0.2600

$$C(t) = (430 + 658.046 e^{-0.260206t})$$

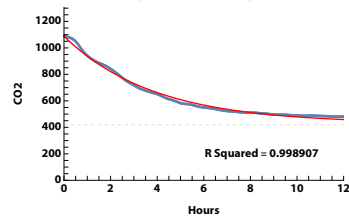

**Zand, et al. (2023). Ventilation during COVID-19 in a school for students with intellectual and developmental disabilities (IDD) [Submitted]**

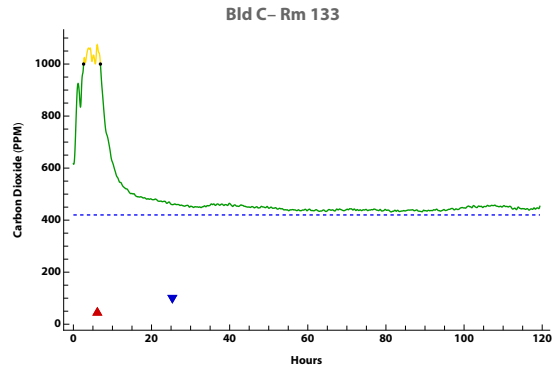

**Bld C- Rm 133 : ACH: 0.2740 ± StandardDeviation[{0.2740}]**

Location: Bld C- Rm 133 - Segment 1

ACH = 0.2740

$$C(t) = (430 + 644.154 e^{-0.273879t})$$

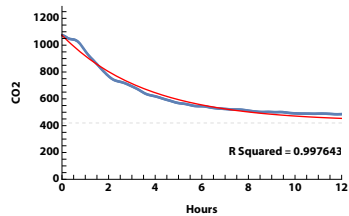

Bld C- Rm 134

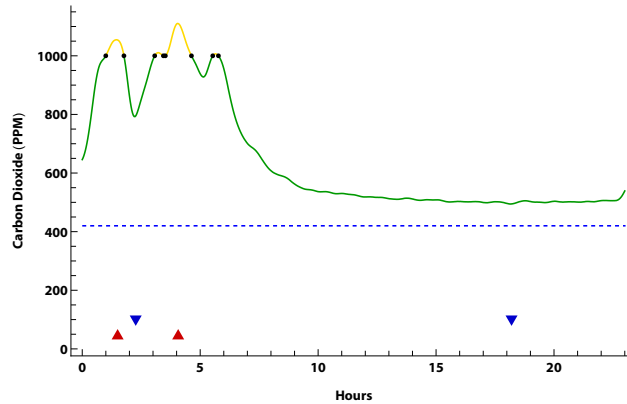

Bld C- Rm 134 : ACH: 0.4430 ± 0.2530

Location: Bld C- Rm 134 - Segment 1

ACH = 0.6220

$$C(t) = (430 + 624.673 e^{-0.622005t})$$

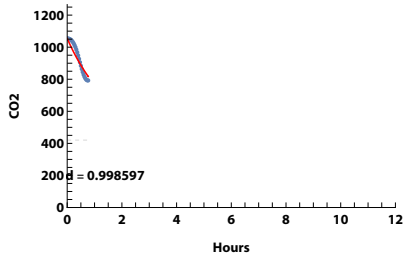

Location: Bld C- Rm 134 - Segment 2

ACH = 0.2640

$$C(t) = (430 + 680.241 e^{-0.263531t})$$

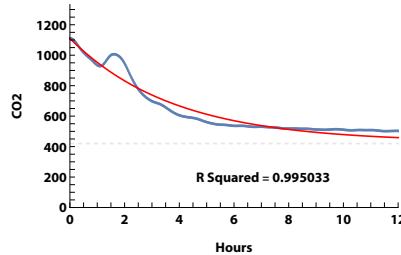

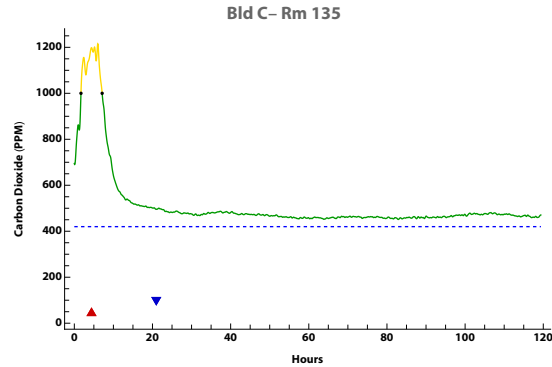

**Bld C- Rm 135 : ACH: 0.1880 ± StandardDeviation[0.1880]**

Location: Bld C- Rm 135 - Segment 1

ACH = 0.1880

$$C(t) = (430 + 785.527 e^{-0.187705t})$$

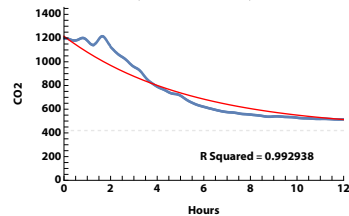

**Zand, et al. (2023). Ventilation during COVID-19 in a school for students with intellectual and developmental disabilities (IDD) [Submitted]**

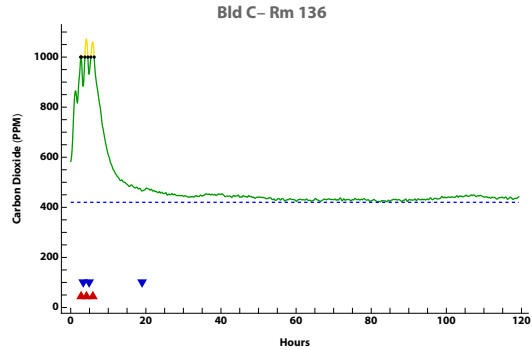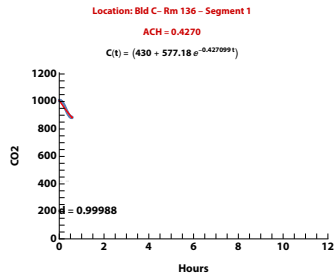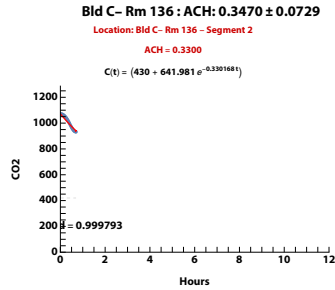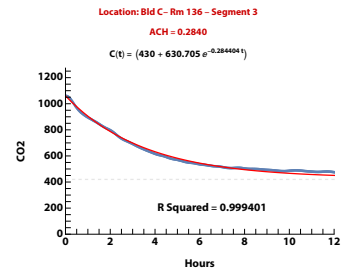

**Zand, et al. (2023). Ventilation during COVID-19 in a school for students with intellectual and developmental disabilities (IDD) [Submitted]**

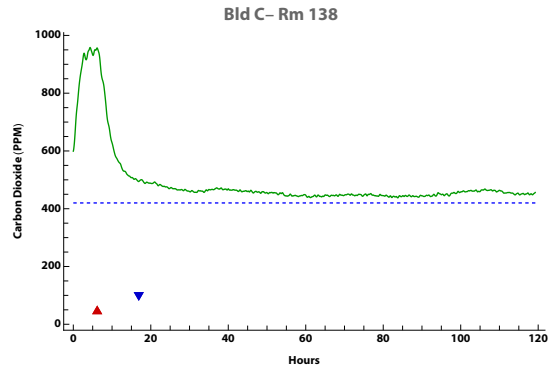

**Bld C- Rm 138 : ACH: 0.2290 ± StandardDeviation[0.2290]**

Location: Bld C- Rm 138 - Segment 1

ACH = 0.2290

$C(t) = (430 + 526.402 e^{-4.229267t})$

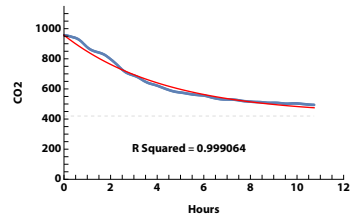

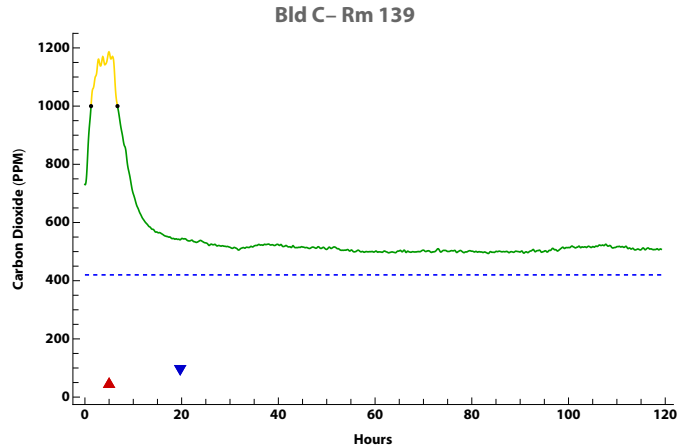

**Bld C – Rm 139 : ACH: 0.1780 ± StandardDeviation[{0.1780}]**

Location: Bld C – Rm 139 – Segment 1

ACH = 0.1780

$$C(t) = (430 + 756.446 e^{-0.177865 t})$$

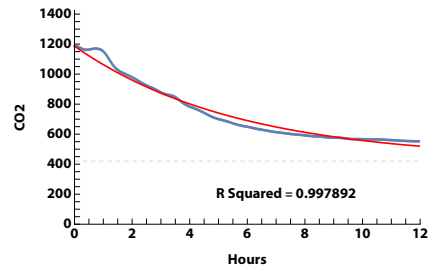

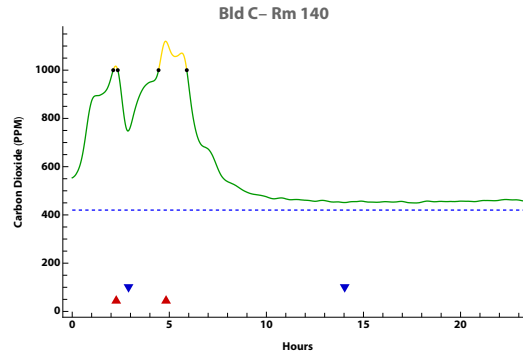

**Bld C- Rm 140 : ACH: 0.6880 ± 0.3180**

Location: Bld C- Rm 140 - Segment 1

ACH = 0.9130

$$C(t) = (430 + 586.769 e^{-0.2913427t})$$

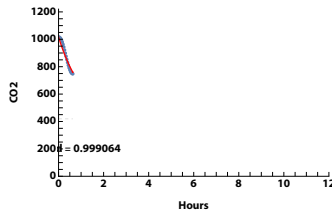

Location: Bld C- Rm 140 - Segment 2

ACH = 0.4630

$$C(t) = (430 + 689.824 e^{-0.463481t})$$

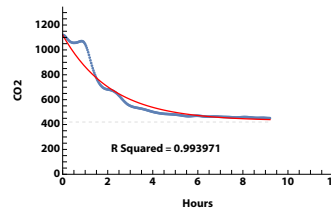



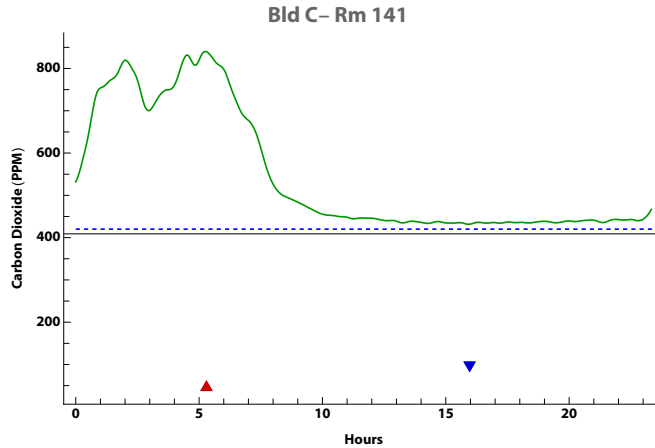

**Bld C – Rm 141 : ACH = 0.4310 ± StandardDeviation[{0.4310}]**

Location: Bld C – Rm 141 – Segment 1

ACH = 0.4310

$$C(t) = (430 + 410.129 e^{-0.431229t})$$

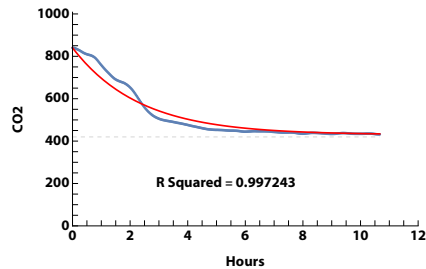

**Zand, et al. (2023). Ventilation during COVID–19 in a school for students with intellectual and developmental disabilities (IDD) [Submitted]**

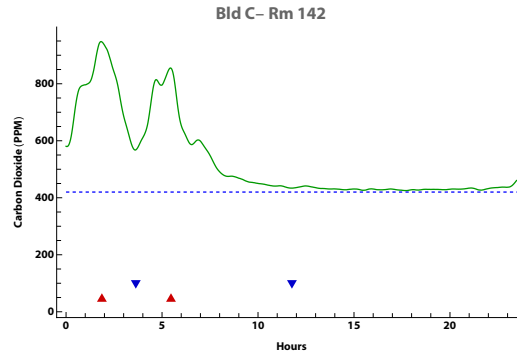

**Bld C- Rm 142 : ACH: 0.6500 ± 0.1250**

Location: Bld C- Rm 142 - Segment 1

ACH = 0.5620

$$C(t) = (430 + 517.945 e^{-0.266783t})$$

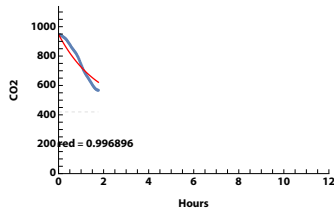

Location: Bld C- Rm 142 - Segment 2

ACH = 0.7390

$$C(t) = (430 + 425.374 e^{-0.738858t})$$

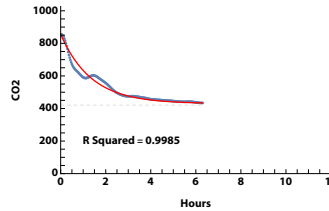

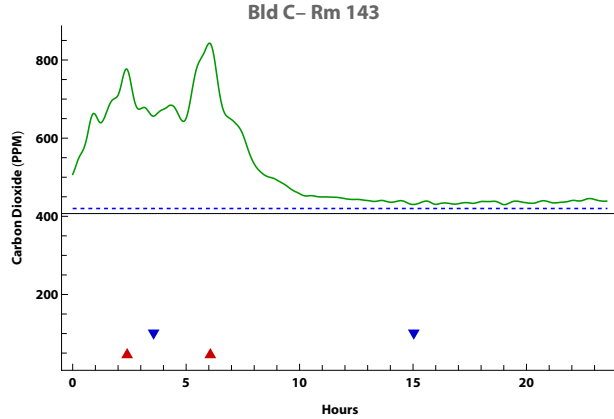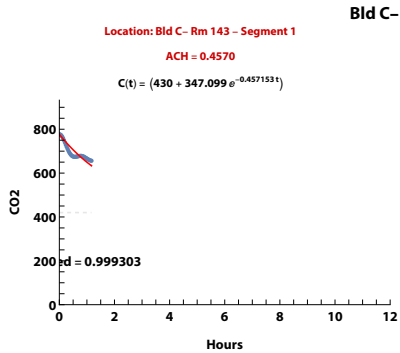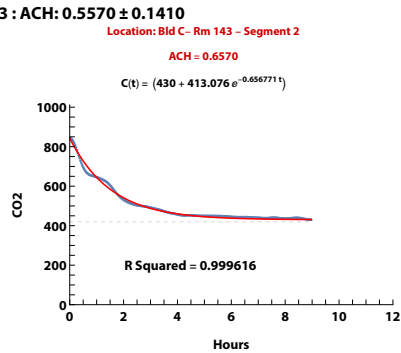

**Zand, et al. (2023). Ventilation during COVID-19 in a school for students with intellectual and developmental disabilities (IDD) [Submitted]**

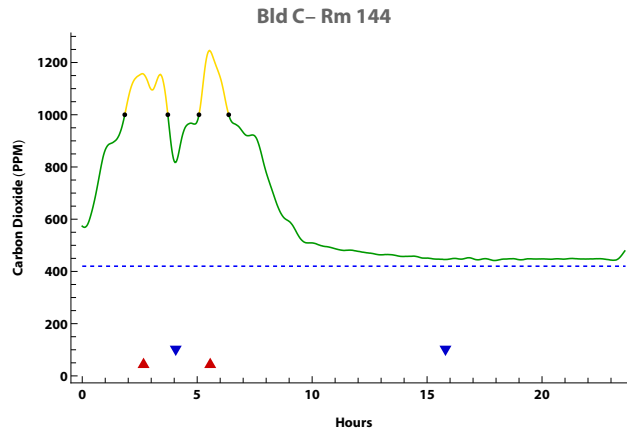

**Bld C- Rm 144 : ACH : 0.3150 ± 0.1300**

Location: Bld C- Rm 144 - Segment 1

ACH = 0.2240

$$C(t) = (430 + 727.062 e^{-0.223819t})$$

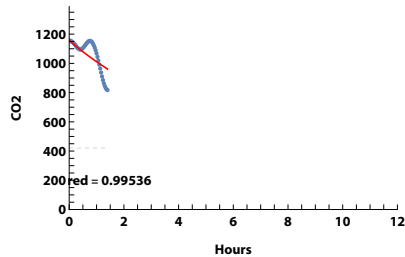

Location: Bld C- Rm 144 - Segment 2

ACH = 0.4070

$$C(t) = (430 + 816.035 e^{-0.407133t})$$

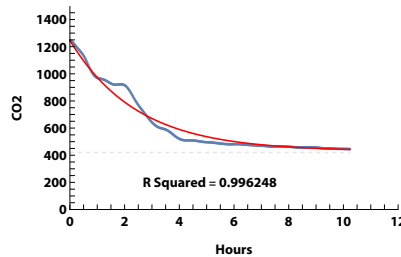

**Zand, et al. (2023). Ventilation during COVID-19 in a school for students with intellectual and developmental disabilities (IDD) [Submitted]**

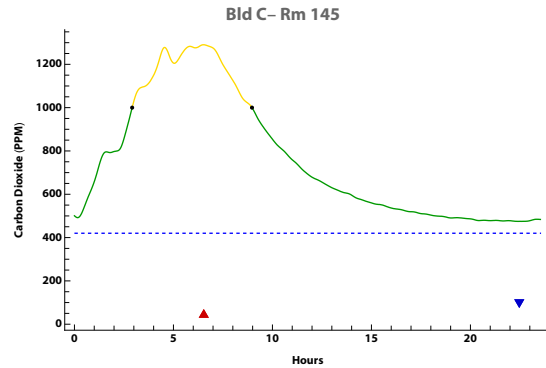

**Bld C- Rm 145 : ACH: 0.2070 ± StandardDeviation[{0.2070}]**

Location: Bld C- Rm 145 - Segment 1

ACH = 0.2070

$$C(t) = (430 + 860.383 e^{-0.207012t})$$

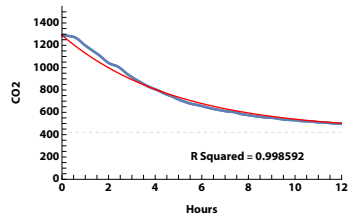

**Zand, et al. (2023). Ventilation during COVID-19 in a school for students with intellectual and developmental disabilities (IDD) [Submitted]**

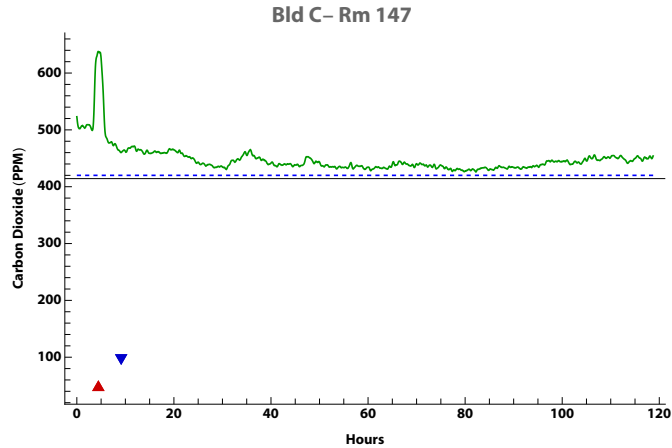

**Bld C – Rm 147 : ACH: 0.5260 ± StandardDeviation[{0.5260}]**

Location: Bld C – Rm 147 – Segment 1

ACH = 0.5260

$$C(t) = (430 + 207.882 e^{-0.525732 t})$$

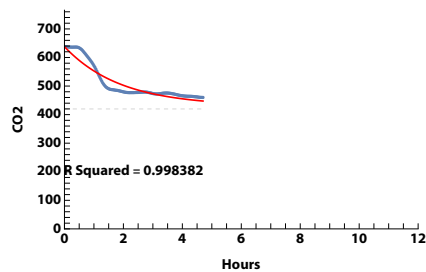

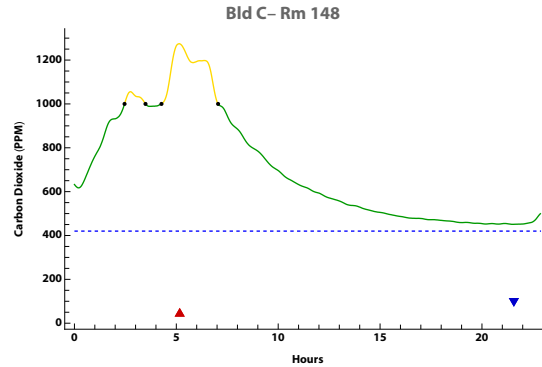

**Bld C- Rm 148 : ACH: 0.2280 ± StandardDeviation{0.2280}**

Location: Bld C- Rm 148 - Segment 1

ACH = 0.2280

$$C(t) = (430 + 844.416 e^{-0.228311t})$$

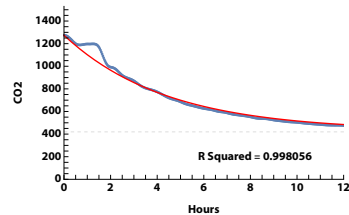

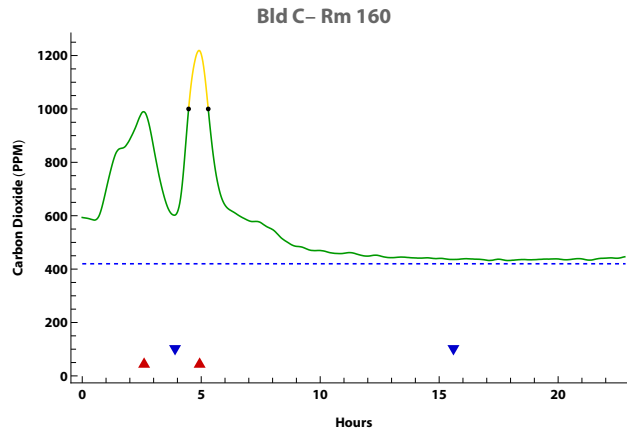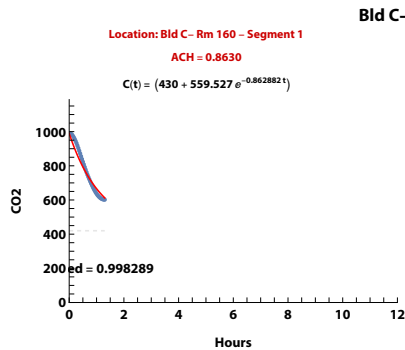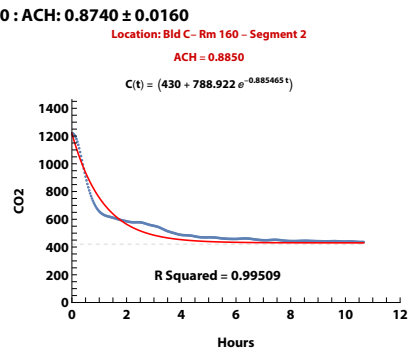

**Zand, et al. (2023). Ventilation during COVID-19 in a school for students with intellectual and developmental disabilities (IDD) [Submitted]**



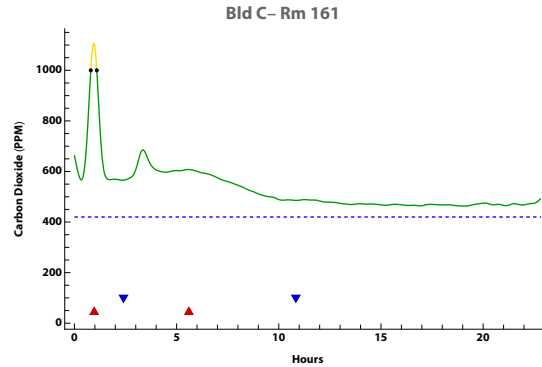

**Bld C- Rm 161 : ACH: 2.1600 ± StandardDeviation[{2.1600}]**

Location: Bld C- Rm 161 - Segment 1

ACH = 2.1600

$$C(t) = (430 + 675.099 e^{-2.16243t})$$

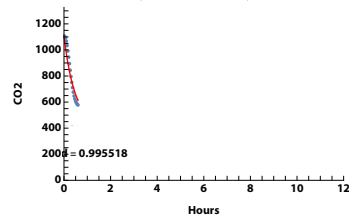

**Zand, et al. (2023). Ventilation during COVID-19 in a school for students with intellectual and developmental disabilities (IDD) [Submitted]**

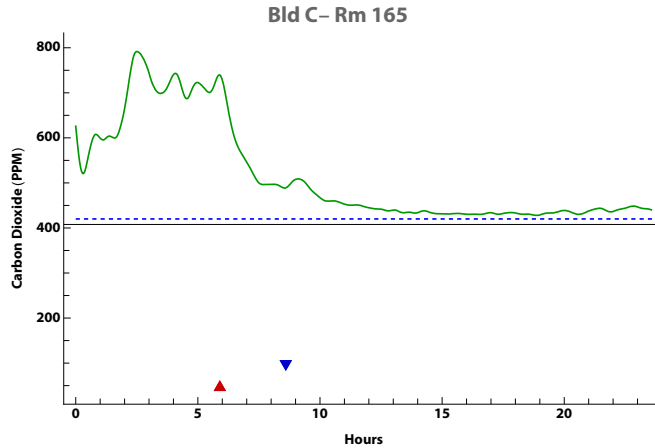

**Bld C- Rm 165 : ACH = 0.8760 ± StandardDeviation[{0.8760}]**

Location: Bld C- Rm 165 - Segment 1

ACH = 0.8760

$$C(t) = (430 + 309.693 e^{-0.876365 t})$$

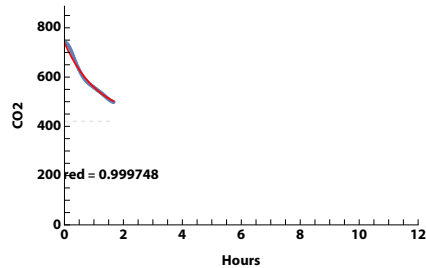

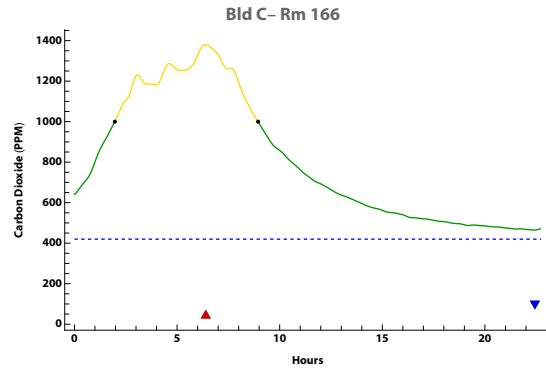

**Bld C- Rm 166 : ACH: 0.2160 ± StandardDeviation[{0.2160}]**

Location: Bld C- Rm 166 - Segment 1

ACH = 0.2160

$C(t) = (430 + 949.615 e^{-0.215644t})$

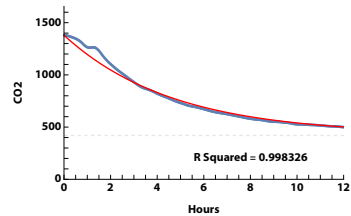

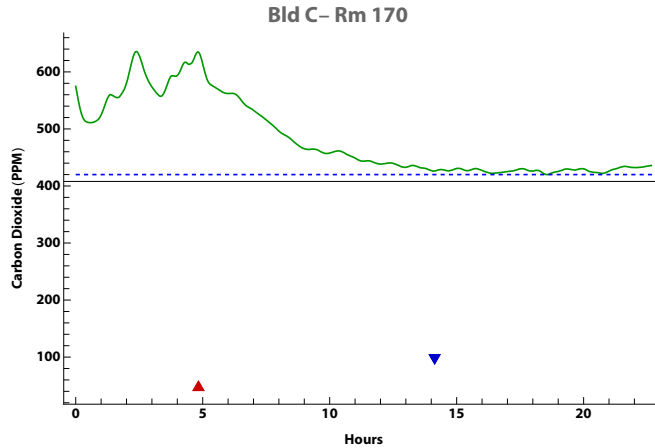

**Bld C – Rm 170 : ACH: 0.3680 ± StandardDeviation[{0.3680}]**

Location: Bld C – Rm 170 – Segment 1

ACH = 0.3680

$$C(t) = (430 + 204.897 e^{-0.368002 t})$$

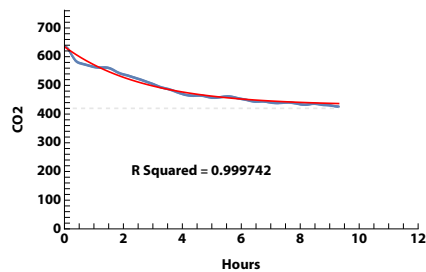

**Zand, et al. (2023). Ventilation during COVID–19 in a school for students with intellectual and developmental disabilities (IDD) [Submitted]**

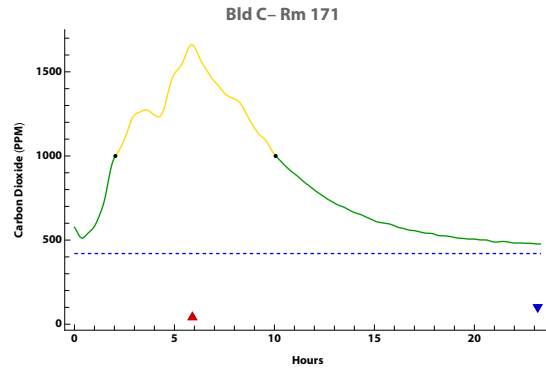

**Bld C- Rm 171 : ACH: 0.1900 ± StandardDeviation[0.1900]**

Location: Bld C- Rm 171 - Segment 1

ACH = 0.1900

$C(t) = (430 + 1230.96 e^{-0.1900571t})$

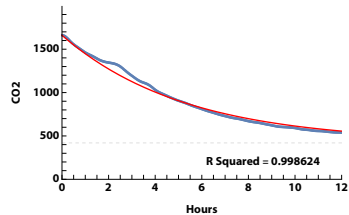

**Zand, et al. (2023). Ventilation during COVID-19 in a school for students with intellectual and developmental disabilities (IDD) [Submitted]**

Bld C- Rm 177

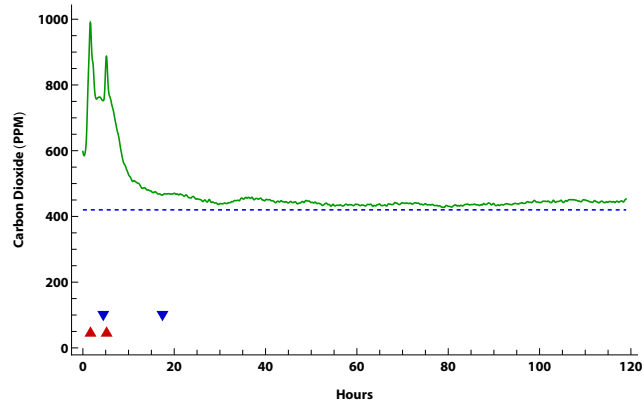

Bld C- Rm 177 : ACH: 0.3830 ± 0.1280

Location: Bld C- Rm 177 - Segment 1

ACH = 0.4740

$$C(t) = (430 + 560.067 e^{-0.473594t})$$

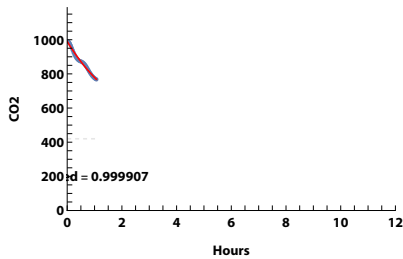

Location: Bld C- Rm 177 - Segment 2

ACH = 0.2930

$$C(t) = (430 + 457.174 e^{-0.293159t})$$

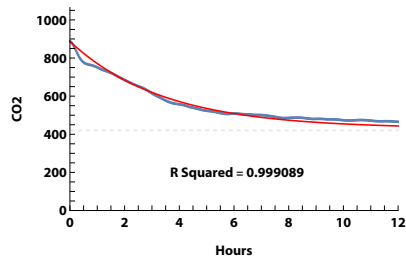

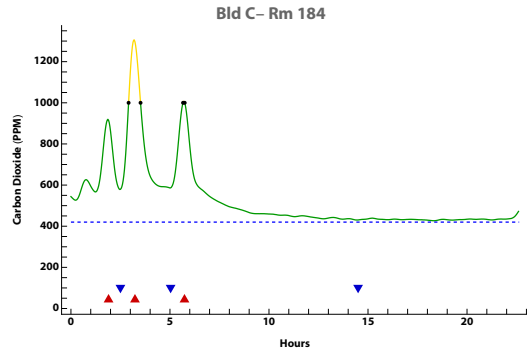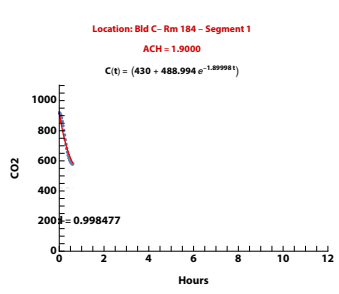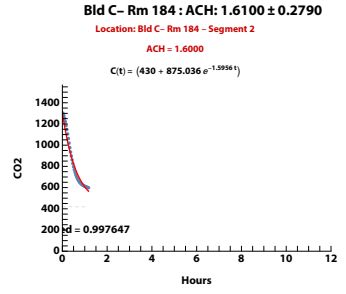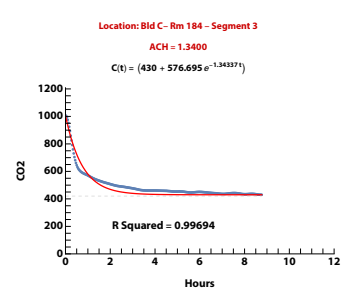

**Zand, et al. (2023). Ventilation during COVID-19 in a school for students with intellectual and developmental disabilities (IDD) [Submitted]**

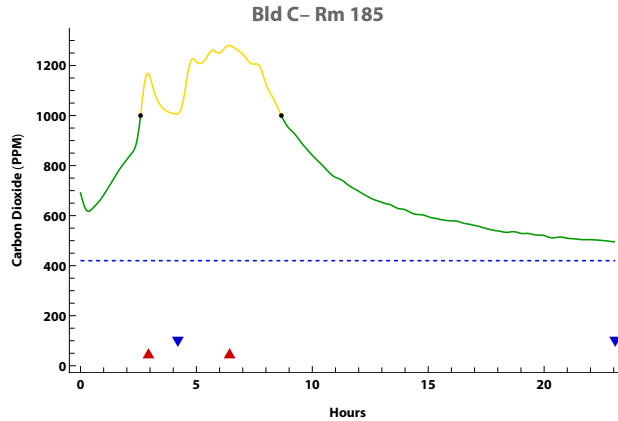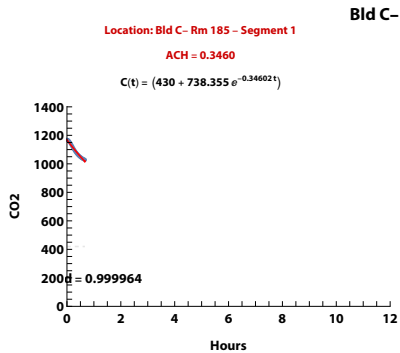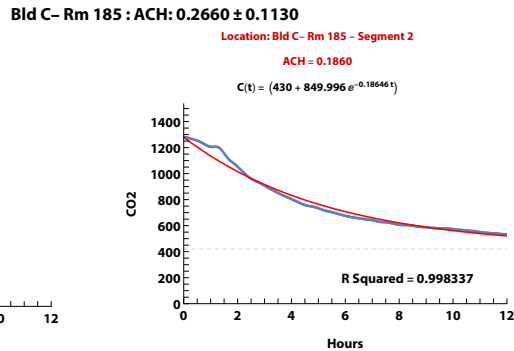

**Zand, et al. (2023). Ventilation during COVID-19 in a school for students with intellectual and developmental disabilities (IDD) [Submitted]**



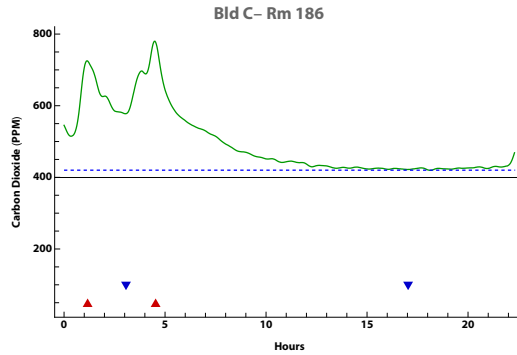

**Bld C- Rm 186 : ACH: 0.5270 ± 0.0827**

Location: Bld C- Rm 186 - Segment 1

ACH = 0.4680

$$C(t) = (430 + 295.257 e^{-0.468416t})$$

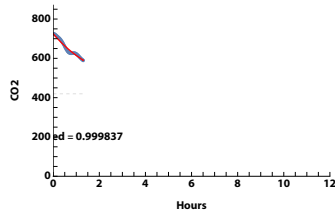

Location: Bld C- Rm 186 - Segment 2

ACH = 0.5850

$$C(t) = (430 + 349.947 e^{-0.585349t})$$

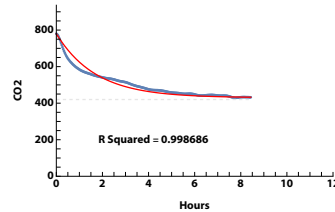

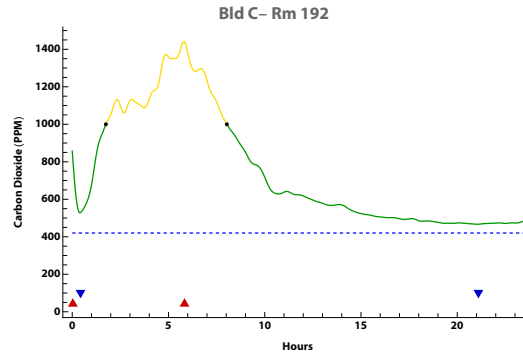

**Bld C- Rm 192 : ACH: 2.2000 ± 2.7300**

Location: Bld C- Rm 192 - Segment 1

ACH = 4.1300

$$C(t) = (430 + 427.103 e^{-4.1347t})$$

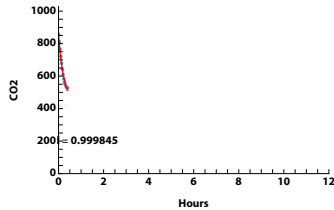

Location: Bld C- Rm 192 - Segment 2

ACH = 0.2680

$$C(t) = (430 + 1011.17 e^{-0.268389t})$$

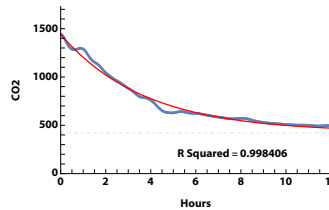

**Zand, et al. (2023). Ventilation during COVID-19 in a school for students with intellectual and developmental disabilities (IDD) [Submitted]**

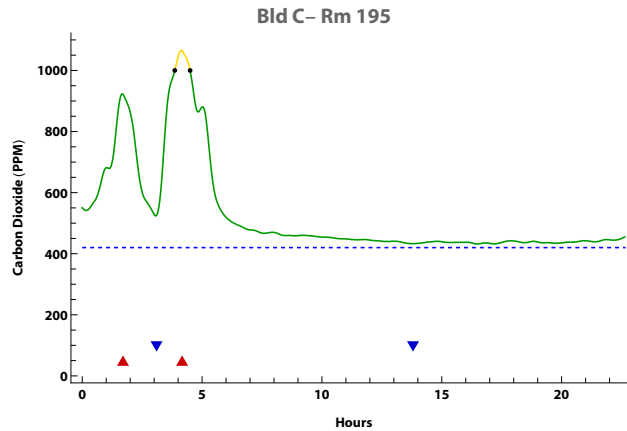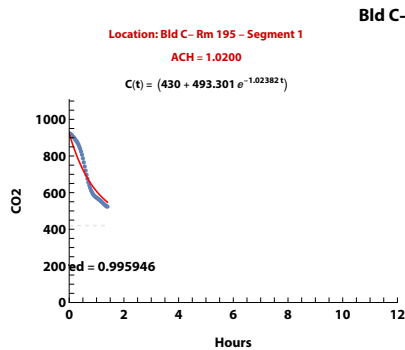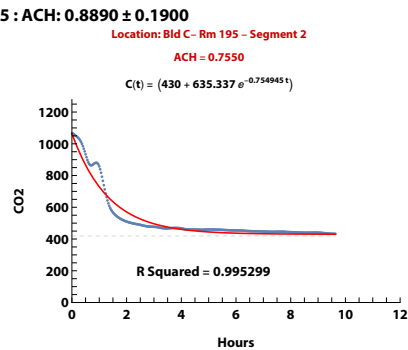

**Zand, et al. (2023). Ventilation during COVID-19 in a school for students with intellectual and developmental disabilities (IDD) [Submitted]**

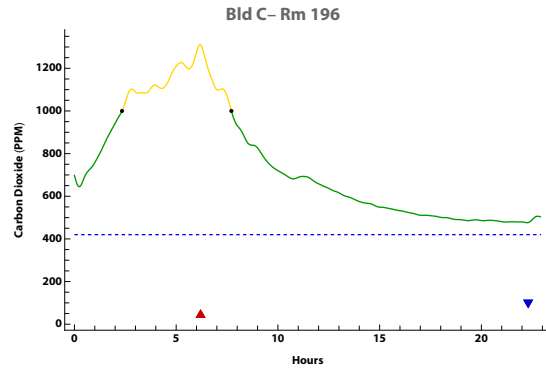

**Bld C- Rm 196 : ACH: 0.2500 ± StandardDeviation[0.2500]**

Location: Bld C- Rm 196 - Segment 1

ACH = 0.2500

$C(t) = (430 + 880.509 e^{-0.249586t})$

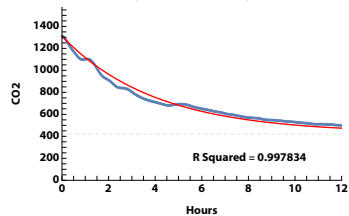

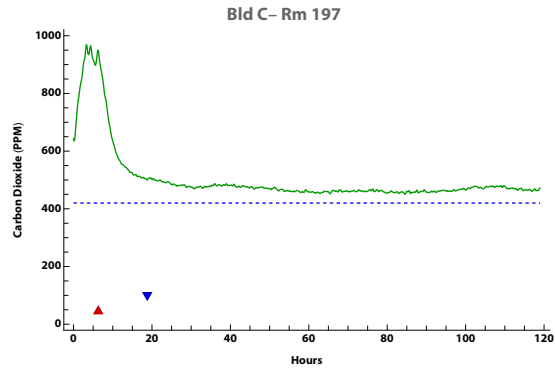

**Bld C- Rm 197 : ACH: 0.2170 ± StandardDeviation{0.2170}**

Location: Bld C- Rm 197 - Segment 1

ACH = 0.2170

$C(t) = (430 + 519.842 e^{-0.216693 t})$

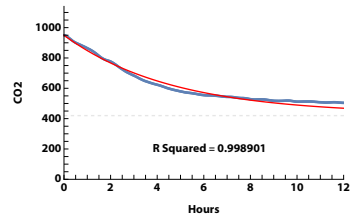

**Zand, et al. (2023). Ventilation during COVID-19 in a school for students with intellectual and developmental disabilities (IDD) [Submitted]**

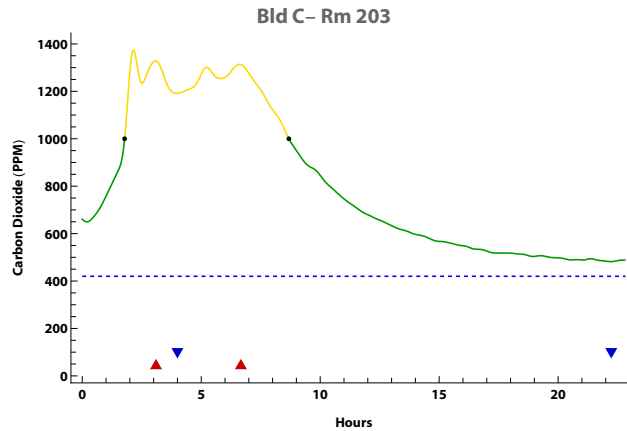

**Bld C – Rm 203 : ACH: 0.2130 ± 0.0104**

Location: Bld C – Rm 203 – Segment 1

ACH = 0.2050

$$C(t) = (430 + 897.915 e^{-0.205224t})$$

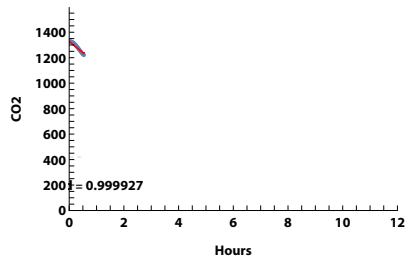

Location: Bld C – Rm 203 – Segment 2

ACH = 0.2200

$$C(t) = (430 + 884.095 e^{-0.219897t})$$

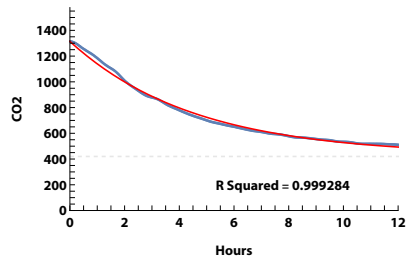

**Zand, et al. (2023). Ventilation during COVID–19 in a school for students with intellectual and developmental disabilities (IDD) [Submitted]**

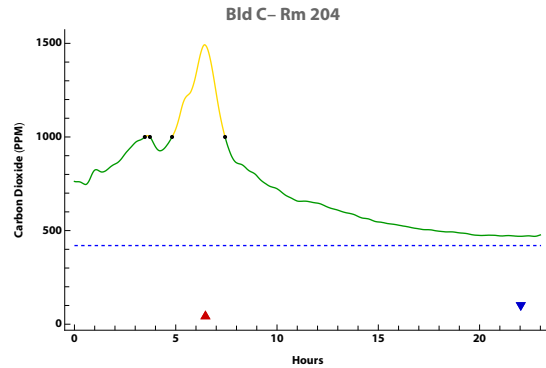

**Bld C- Rm 204 : ACH: 0.3620 ± StandardDeviation[0.3620]**

Location: Bld C- Rm 204 - Segment 1

ACH = 0.3620

$$C(t) = (430 + 1062.55 e^{-0.361717t})$$

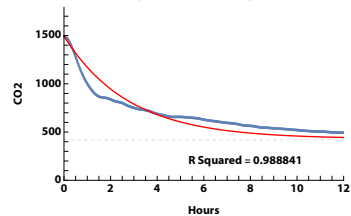

**Zand, et al. (2023). Ventilation during COVID-19 in a school for students with intellectual and developmental disabilities (IDD) [Submitted]**

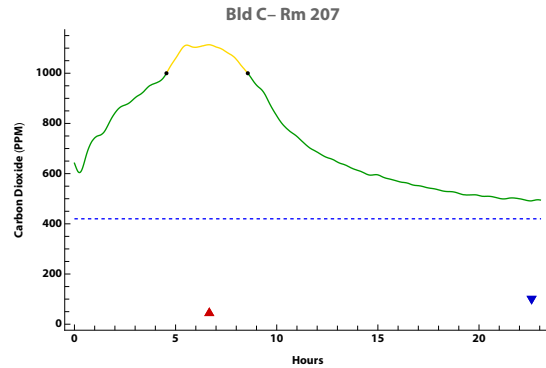

**Bld C- Rm 207 : ACH: 0.1640 ± StandardDeviation{0.1640}**

Location: Bld C- Rm 207 - Segment 1

ACH = 0.1640

$C(t) = (430 + 683.533 e^{-0.163997t})$

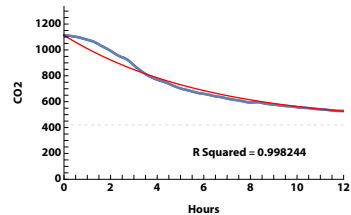



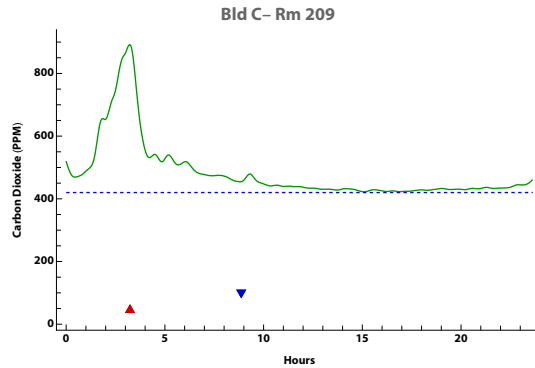

**Bld C- Rm 209 : ACH: 0.9800 ± StandardDeviation[0.9800]**

Location: Bld C- Rm 209 - Segment 1

ACH = 0.9800

$$C(t) = (430 + 461.486 e^{-0.980219t})$$

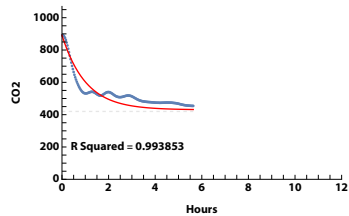

**Zand, et al. (2023). Ventilation during COVID-19 in a school for students with intellectual and developmental disabilities (IDD) [Submitted]**

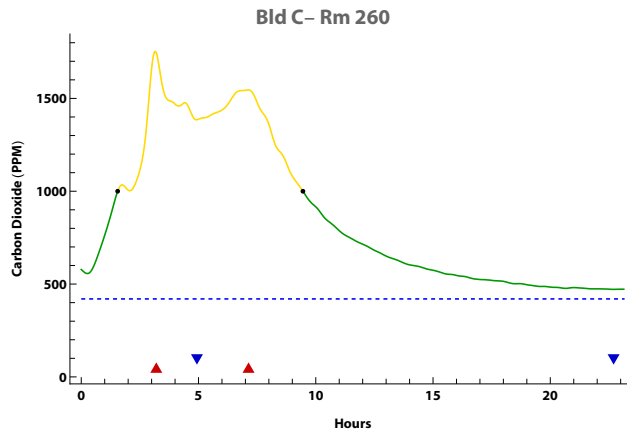

**Bld C - Rm 260 : ACH = 0.2480 ± 0.0312**

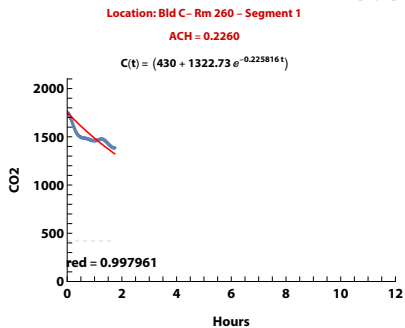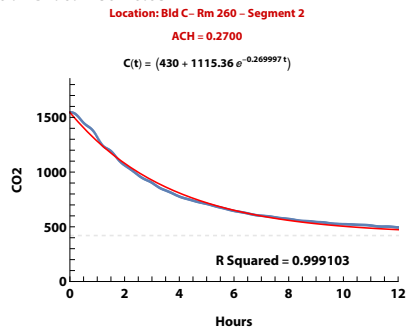

**Zand, et al. (2023). Ventilation during COVID-19 in a school for students with intellectual and developmental disabilities (IDD) [Submitted]**
